# Supplementary material
Source: PubMed Central journal article supplement (PMC8810395)
Supplement: NIHMS1771776-supplement-Supplemental_material.pdf [file NIHMS1771776-supplement-Supplemental_material.pdf]

**Supplementary table S1. Comparison of clinical variable at baseline and 6 months after tocilizumab treatment.**

| Variable           | Baseline<br>N= 35 | 6 months<br>N= 35 | p                |
|--------------------|-------------------|-------------------|------------------|
| Age                | 53.42 ± 10.57     | 53.85 ± 10.60     | 0.87             |
| DAS28ESR           | 5.78 ± 0.99       | 3.32 ± 1.05       | <b>&lt;0.001</b> |
| ESR                | 52.29 ± 31.44     | 19.39 ± 26.27     | <b>&lt;0.001</b> |
| CRP                | 1.99 ± 2.69       | 0.20 ± 0.45       | <b>&lt;0.001</b> |
| Swollen joints     | 6.00 ± 4.08       | 2.00 ± 2.67       | <b>&lt;0.001</b> |
| Tender joints      | 9.26 ± 6.32       | 3.03 ± 3.59       | <b>&lt;0.001</b> |
| VAS patient, score | 67.43 ± 18.10     | 38.94 ± 22.16     | <b>&lt;0.001</b> |
| VAS medic, score   | 55.40 ± 21.58     | 23.47 ± 17.06     | <b>&lt;0.001</b> |
| HAQ, score         | 1.41 ± 0.68       | 0.91 ± 0.61       | <b>0.002</b>     |
| SDAI, score        | 29.53 ± 11.41     | 11.87 ± 6.98      | <b>&lt;0.001</b> |
| CDAI, score        | 27.54 ± 10.54     | 11.27 ± 7.12      | <b>&lt;0.001</b> |

Continue variables expressed in mean ± standard deviation; Categorical variables expressed in percentage. RF: rheumatoid factor; IU: International units; Anti-CCP: anti-cyclic citrullinated peptide; ESR: erythrocyte sedimentation rate; CRP: C-reactive protein; VAS: Visual analogue scale; HAQ: health assessment questionnaire; DAS-28: disease activity score in base of 28 joints; SDAI: simple disease activity index; CDAI: clinical disease activity index.

**Supplementary table S2. Comparison of clinical variables between non-responders and responders at baseline.**

| Variable              | Non responders                | Responders       | p            |
|-----------------------|-------------------------------|------------------|--------------|
|                       | (No resp + Moderate)<br>N= 18 | (Good)<br>N= 17  |              |
| Age, years            | 51.88 ± 11.15                 | 55.11 ± 9.98     | 0.37         |
| Tobacco use, n (%)    | 5 (27.8)                      | 3 (17.6)         | 0.69         |
| Diabetes, n (%)       | 1 (5.6)                       | 32(11.8)         | 0.60         |
| Hypertension, n (%)   | 4 (22.2)                      | 6 (30)           | 0.72         |
| Dyslipidemia n (%)    | 2 (11.1)                      | 5 (29.4)         | 0.23         |
| RF, positive (%)      | 12 (66.7)                     | 11 (64.7)        | 1.00         |
| Anti-CCP positive (%) | 11 (61.1)                     | 12 (70.6)        | 0.72         |
| Seropositive, n (%)   | 14 (77.8)                     | 14 (82.4)        | 1.00         |
| ESR,                  | 61.75 ± 36.63                 | 39.67 ± 16.75    | <b>0.002</b> |
| CRP, mg/Dl            | 1.87 ± 2.31                   | 2.15 ± 3.21      | 0.89         |
| Swollen joints,       | 5.50 ± 4.20                   | 6.67 ± 3.96      | 0.81         |
| Tender joints,        | 8.90 ± 6.59                   | 9.73 ± 5.91      | 0.54         |
| VAS patients,         | 68.25 ± 19.33                 | 66.33 ± 16.92    | 0.70         |
| VAS medic,            | 59.85 ± 21.59                 | 49.47 ± 20.79    | 0.36         |
| DAS28-ESR             | 5.94 ± 0.93                   | 5.76 ± 0.91      | 0.30         |
| HAQ, score            | 1.58 ± 0.65                   | 1.18 ± 0.67      | 0.11         |
| SDAI, score           | 29.08 ± 11.38                 | 30.13 ± 11.82    | 0.87         |
| CDAI, score           | 27.21 ± 10.43                 | 27.98 ± 11.04    | 0.84         |
| IL-6, pg/mL           | 379.91 ± 301.12               | 805.15 ± 1165.75 | 0.27         |
| sIL6R, pg/mL          | 355043.25 ± 312953            | 312714 ± 357374  | 0.79         |
| IL-6/sIL-6R           | 0.001 ± 0.001                 | 0.005 ± 0.010    | 0.20         |

Continuous variables expressed in mean ± standard deviation; Categorical variables expressed in percentage. The response was evaluated using EULAR criteria and they were classified as a Responders = Good response and, Non-responders = moderate response and no response. RF: rheumatoid factor; Anti-CCP: anti-cycle citrullinated peptide; ESR: erythrocyte sedimentation rate; CRP: C-reactive protein; VAS: visual analogue scale; DAS28: disease activity score in base of 28 joints; HAQ: health assessment questionnaire; SDAI: simple disease activity index; CDAI: clinical disease activity index; IL-6: interleukin-6.

**Supplementary Table S3. Comparison of metabolites concentration between non-responders and responders at baseline.**

| Variable $\mu\text{M}$ | Baseline              |                       |             |
|------------------------|-----------------------|-----------------------|-------------|
|                        | Non-responders        | Responders            | P           |
|                        | N= 18                 | N= 17                 |             |
| 3-Hydroxybutyrate      | 12.96 $\pm$ 7.57      | 26.86 $\pm$ 19.82     | <b>0.01</b> |
| 5,6-Dihydrothymine     | 17.25 $\pm$ 8.29      | 19.26 $\pm$ 10.02     | 0.52        |
| Acetate,               | 177. $\pm$ 112.89     | 162.78 $\pm$ 90.96    | 0.66        |
| Acetoacetate           | 21.97 $\pm$ 24.14     | 28.58 $\pm$ 15.68     | 0.35        |
| Acetone                | 795.51 $\pm$ 1365.32  | 335.88 $\pm$ 365.87   | 0.19        |
| Adipate                | 280.40 $\pm$ 256.80   | 206.77 $\pm$ 86.01    | 0.27        |
| Alanine                | 132.79 $\pm$ 50.44    | 148.15 $\pm$ 55.29    | 0.40        |
| Arginine               | 22.95 $\pm$ 15.02     | 28.39 $\pm$ 17.39     | 0.33        |
| Betaine                | 9.78 $\pm$ 5.50       | 10.26 $\pm$ 7.53      | 0.83        |
| Butyrate               | 14.33 $\pm$ 6.37      | 16.78 $\pm$ 5.60      | 0.24        |
| Carnitine              | 5.99 $\pm$ 4.34       | 9.80 $\pm$ 8.28       | 0.10        |
| Choline                | 9.11 $\pm$ 3.04       | 9.87 $\pm$ 2.31       | 0.41        |
| Citrate                | 8.14 $\pm$ 3.61       | 8.36 $\pm$ 4.99       | 0.88        |
| Creatine               | 10.38 $\pm$ 3.22      | 11.85 $\pm$ 4.45      | 0.27        |
| Creatine phosphate     | 19.42 $\pm$ 11.43     | 22.23 $\pm$ 10.23     | 0.45        |
| Creatinine             | 7.17 $\pm$ 2.82       | 7.58 $\pm$ 3.67       | 0.71        |
| Dimethylamine          | 4.20 $\pm$ 3.85       | 3.99 $\pm$ 2.88       | 0.86        |
| Formate                | 70.54 $\pm$ 61.24     | 58.20 $\pm$ 37.13     | 0.47        |
| Fumarate               | 2.46 $\pm$ 1.53       | 2.68 $\pm$ 1.45       | 0.66        |
| Glutamate              | 107.79 $\pm$ 29.51    | 119.37 $\pm$ 26.16    | 0.23        |
| Glutamine              | 41.14 $\pm$ 33.85     | 32.34 $\pm$ 25.57     | 0.39        |
| Glycine                | 88.05 $\pm$ 32.77     | 97.84 $\pm$ 29.01     | 0.36        |
| Isobutyrate            | 7.79 $\pm$ 2.60       | 9.77 $\pm$ 2.29       | <b>0.02</b> |
| Isoleucine             | 27.11 $\pm$ 8.98      | 29.88 $\pm$ 6.39      | 0.30        |
| Isovalerate            | 10.22 $\pm$ 5.49      | 13.13 $\pm$ 5.64      | 0.13        |
| Lactate                | 3141.23 $\pm$ 1205.49 | 3432.57 $\pm$ 1592.72 | 0.54        |
| Leucine                | 41.29 $\pm$ 15.16     | 48.41 $\pm$ 13.62     | 0.15        |

|                             |               |                |             |
|-----------------------------|---------------|----------------|-------------|
| Lysine                      | 48.22 ± 13.96 | 57.36 ± 12.68  | <b>0.05</b> |
| Methionine                  | 5.80 ± 2.76   | 6.06 ± 2.78    | 0.78        |
| Methylamine                 | 2.44 ± 0.93   | 2.92 ± 1.25    | 0.21        |
| Methylsuccinate             | 3.99 ± 1.70   | 4.00 ± 1.45    | 0.98        |
| O-Phosphocholine            | 19.15 ± 7.80  | 23.45 ± 4.97   | 0.06        |
| Ornithine                   | 38.37 ± 14.35 | 44.28 ± 13.12  | 0.21        |
| Phenylalanine               | 18.92 ± 5.18  | 22.88 ± 4.59   | <b>0.02</b> |
| Proline                     | 49.77 ± 14.88 | 58.85 ± 20.37  | 0.14        |
| Pyruvate                    | 6.91 ± 2.02   | 8.30 ± 4.64    | 0.27        |
| Sarcosine                   | 2.58 ± 3.17   | 4.63 ± 2.84    | 0.053       |
| Serine                      | 38.08 ± 16.14 | 37.30 ± 8.36   | 0.85        |
| sn-Glycero-3-phosphocholine | 46.29 ± 29.99 | 75.13 ± 41.51  | <b>0.02</b> |
| Succinate                   | 11.39 ± 5.01  | 12.35 ± 4.88   | 0.57        |
| Threonine                   | 41.25 ± 19.58 | 46.68 ± 13.20  | 0.35        |
| Trimethylamine N-oxide      | 5.82 ± 5.85   | 5.75 ± 2.87    | 0.96        |
| Tryptophan                  | 15.54 ± 6.46  | 20.37 ± 4.51   | <b>0.01</b> |
| Tyrosine                    | 30.64 ± 10.35 | 37.64 ± 7.96   | <b>0.03</b> |
| Valine                      | 88.78 ± 24.94 | 100.58 ± 21.66 | 0.14        |

---

Variables expressed in mean ± standard deviation. The response was evaluated using EULAR criteria. Responders = Good response; Non-responders = moderate and no response. Concentration are expressed in µM

**Supplementary Table S4. Comparison of metabolites concentration between baseline and 6 months after treatment.**

| <b>Variables</b>   | <b>Normal range<br/>(<math>\mu\text{M}</math>)</b> | <b>Baseline<br/>N= 35</b> | <b>6 months<br/>N= 35</b> | <b>P</b>         |
|--------------------|----------------------------------------------------|---------------------------|---------------------------|------------------|
| 3-Hydroxybutyrate  | 22-700                                             | 19.71 $\pm$ 16.22         | 21.47 $\pm$ 16.77         | 0.66             |
| 5,6-Dihydrothymine | ND                                                 | 18.22 $\pm$ 9.09          | 21.28 $\pm$ 9.63          | 0.18             |
| Acetate            | 26.8-57                                            | 170.60 $\pm$ 101.61       | 143.72 $\pm$ 65.60        | 0.19             |
| Acetoacetate       | 4.1-77.1                                           | 25.18 $\pm$ 20.46         | 27.65 $\pm$ 15.38         | 0.57             |
| Acetone            | 24.8-84                                            | 572.26 $\pm$ 1024.69      | 366.76 $\pm$ 415.48       | 0.27             |
| Adipate            | 0.08-0.1                                           | 244.64 $\pm$ 194.55       | 243.33 $\pm$ 208.76       | 0.98             |
| Alanine            | 200-579                                            | 140.25 $\pm$ 52.64        | 187.86 $\pm$ 47.90        | <b>&lt;0.001</b> |
| Arginine           | 72.5-112                                           | 25.59 $\pm$ 16.21         | 33.41 $\pm$ 18.79         | 0.07             |
| Betaine            | 23.9-42.1                                          | 10.01 $\pm$ 6.47          | 11.64 $\pm$ 6.93          | 0.31             |
| Butyrate           | 0.3-1.5                                            | 15.52 $\pm$ 6.03          | 15.94 $\pm$ 5.56          | 0.76             |
| Carnitine          | 26.0-79                                            | 7.84 $\pm$ 6.74           | 5.67 $\pm$ 4.95           | 0.13             |
| Choline            | 8.70-19.8                                          | 9.48 $\pm$ 2.70           | 11.18 $\pm$ 2.48          | <b>0.008</b>     |
| Citrate            | 30-400                                             | 8.24 $\pm$ 4.27           | 10.21 $\pm$ 4.45          | 0.06             |
| Creatine           | 33.8-75.8                                          | 11.09 $\pm$ 3.88          | 13.82 $\pm$ 5.07          | <b>0.01</b>      |
| Creatine phosphate | ND                                                 | 20.78 $\pm$ 10.80         | 22.23 $\pm$ 8.61          | 0.54             |
| Creatinine         | 35-122                                             | 7.36 $\pm$ 3.22           | 7.73 $\pm$ 2.86           | 0.62             |
| Dimethylamine      | 3.33-53.22                                         | 4.10 $\pm$ 3.36           | 3.58 $\pm$ 1.88           | 0.43             |
| Formate            | 23.90-219.5                                        | 64.55 $\pm$ 50.63         | 60.66 $\pm$ 30.85         | 0.70             |
| Fumarate           | 0 - 4                                              | 2.57 $\pm$ 1.48           | 2.43 $\pm$ 1.07           | 0.66             |
| Glutamate          | 20-110                                             | 113.41 $\pm$ 28.14        | 120.55 $\pm$ 37.38        | 0.37             |
| Glutamine          | 502-670                                            | 36.87 $\pm$ 30.01         | 56.20 $\pm$ 26.64         | <b>0.006</b>     |
| Glycine            | 120-320                                            | 92.81 $\pm$ 30.95         | 108.30 $\pm$ 33.61        | <b>0.04</b>      |
| Isobutyrate        | 0.7 - 4.4                                          | 8.75 $\pm$ 2.62           | 9.57 $\pm$ 2.75           | 0.21             |
| Isoleucine         | 30-108                                             | 28.46 $\pm$ 7.85          | 31.63 $\pm$ 7.01          | 0.08             |
| Isovalerate        | 0.3 - 2.7                                          | 11.63 $\pm$ 5.68          | 12.62 $\pm$ 4.69          | 0.42             |
| Lactate            | 740-2400                                           | 3282.74 $\pm$ 1393.72     | 4061.33 $\pm$ 833.77      | <b>0.006</b>     |
| Leucine            | 70-180                                             | 44.75 $\pm$ 14.67         | 51.62 $\pm$ 14.63         | <b>0.05</b>      |
| Lysine             | 71-151                                             | 52.66 $\pm$ 13.95         | 61.54 $\pm$ 12.35         | <b>0.006</b>     |
| Methionine         | 13-45                                              | 5.93 $\pm$ 2.32           | 5.64 $\pm$ 2.32           | 0.63             |
| Methylamine        | 0.37-4                                             | 2.68 $\pm$ 1.11           | 2.88 $\pm$ 1.23           | 0.46             |

|                  |             |               |                |              |
|------------------|-------------|---------------|----------------|--------------|
| Methylsuccinate  | ND          | 3.99 ± 1.56   | 4.33 ± 2.28    | 0.47         |
| O-Phosphocholine | 1.2 - 3.2   | 21.24 ± 6.84  | 21.54 ± 4.21   | 0.82         |
| Ornithine        | 39-71       | 41.24 ± 13.89 | 46.81 ± 13.75  | 0.09         |
| Phenylalanine    | 48-66       | 20.84 ± 5.22  | 22.85 ± 7.83   | 0.21         |
| Proline          | 108-228     | 54.18 ± 18.09 | 68.41 ± 23.22  | <b>0.006</b> |
| Pyruvate         | 22-258      | 7.58 ± 3.56   | 7.78 ± 3.27    | 0.81         |
| Sarcosine        | 0-5         | 3.58 ± 3.15   | 4.21 ± 3.07    | 0.40         |
| Serine           | 95-133      | 37.70 ± 12.78 | 49.75 ± 18.19  | <b>0.002</b> |
| SNG3PC           | ND          | 60.30 ± 38.40 | 53.88 ± 25.34  | 0.41         |
| Succinate        | 0-32        | 11.85 ± 4.90  | 13.45 ± 5.32   | 0.19         |
| Threonine        | 85-231      | 43.88 ± 16.77 | 52.24 ± 17.14  | <b>0.04</b>  |
| TMAO             | 18.44-59.18 | 5.78 ± 4.58   | 5.03 ± 3.90    | 0.46         |
| Tryptophan       | 37-51       | 17.88 ± 6.04  | 20.47 ± 5.40   | 0.06         |
| Tyrosine         | 47-71       | 34.04 ± 9.79  | 38.12 ± 8.11   | 0.06         |
| Valine           | 151-273.6   | 94.51 ± 23.82 | 106.88 ± 18.16 | <b>0.02</b>  |

Continuous variables expressed in mean ± standard deviation; Concentration of metabolites is expressed in μM. L= low, M= medium (within range), H= high compared to reference concentration from HMDB, PubChem and KEGG. SNG3PC: Sn-glycero-3-phosphocholine, TMAO: trimethylamine N-oxide; ND: no data available in uM. <sup>1</sup>Normal range in adult's blood according to the Human Metabolome data base. <https://hmdb.ca/>

**Comparison of metabolites' concentration between <55 years old and >= 55 years old patients at baseline.**

| <b>Variables</b>      | <b>&lt;=55 years old<br/>(n=19)</b> | <b>&gt;55 years old<br/>(n=16)</b> | <b>p</b>     |
|-----------------------|-------------------------------------|------------------------------------|--------------|
| Swollen Joints        | 5.11 ± 4.52                         | 7.06 ± 3.32                        | 0.34         |
| Tender joints         | 9.05 ± 6.17                         | 9.50 ± 6.50                        | 0.84         |
| VAS Patient           | 66.79 ± 17.38                       | 68.19 ± 19.46                      | 0.82         |
| VAS Medic             | 51.89 ± 21.33                       | 59.56 ± 21.81                      | 0.3          |
| HAQ                   | 1.34 ± 0.59                         | 1.50 ± 0.78                        | 0.5          |
| DAS28                 | 5.81 ± 1.09                         | 5.74 ± 0.89                        | 0.84         |
| SDAI                  | 27.00 ± 10.54                       | 32.54 ± 12.00                      | 0.15         |
| CDAI                  | 26.03 ± 9.96                        | 29.34 ± 11.25                      | 0.36         |
| 3-Hydroxybutyrate uM  | 16.24 ± 12.82                       | 23.83 ± 19.14                      | 0.18         |
| 5,6-Dihydrothymine uM | 16.85 ± 8.48                        | 19.86 ± 9.80                       | 0.34         |
| Acetate uM            | 158.98 ± 93.64                      | 184.41 ± 111.83                    | 0.47         |
| Acetoacetate uM       | 18.78 ± 15.80                       | 32.79 ± 23.13                      | <b>0.04</b>  |
| Acetone uM            | 681.45 ± 1313.22                    | 442.61 ± 525.44                    | 0.5          |
| Adipate uM            | 199.16 ± 132.97                     | 298.66 ± 242.58                    | 0.13         |
| Alanine uM            | 135.52 ± 62.02                      | 145.88 ± 40.04                     | 0.57         |
| Arginine uM           | 23.47 ± 18.87                       | 28.11 ± 12.49                      | 0.39         |
| Betaine uM            | 9.94 ± 7.12                         | 10.11 ± 5.85                       | 0.94         |
| Butyrate uM           | 13.44 ± 6.66                        | 18.00 ± 4.16                       | <b>0.019</b> |
| Carnitine uM          | 8.27 ± 8.06                         | 7.33 ± 4.96                        | 0.69         |
| Choline uM            | 8.95 ± 2.74                         | 10.12 ± 2.59                       | 0.2          |
| Citrate uM            | 7.95 ± 4.90                         | 8.60 ± 3.52                        | 0.66         |
| Creatine uM           | 11.14 ± 4.77                        | 11.03 ± 2.62                       | 0.93         |
| Creatine phosphate uM | 18.71 ± 10.74                       | 23.26 ± 10.68                      | 0.22         |
| Creatinine uM         | 6.07 ± 2.80                         | 8.91 ± 3.07                        | <b>0.007</b> |
| Dimethylamine uM      | 3.81 ± 3.00                         | 4.45 ± 3.82                        | 0.58         |
| Formate uM            | 52.64 ± 46.16                       | 78.69 ± 53.49                      | 0.13         |
| Fumarate uM           | 2.54 ± 1.52                         | 2.61 ± 1.47                        | 0.89         |
| Glucose uM            | 554.39 ± 609.36                     | 744.38 ± 594.04                    | 0.36         |
| Glutamate uM          | 108.49 ± 27.17                      | 119.25 ± 29.03                     | 0.27         |
| Glutamine uM          | 32.12 ± 27.05                       | 42.51 ± 33.18                      | 0.31         |
| Glycine uM            | 87.26 ± 32.66                       | 99.40 ± 28.38                      | 0.25         |
| Isobutyrate uM        | 8.64 ± 3.33                         | 8.89 ± 1.49                        | 0.77         |
| Isoleucine uM         | 27.69 ± 9.18                        | 29.37 ± 6.07                       | 0.52         |
| Isovalerate uM        | 11.23 ± 7.00                        | 12.12 ± 3.72                       | 0.65         |
| Lactate uM            | 3070.75 ± 1425.21                   | 3534.48 ± 1356.79                  | 0.33         |
| Leucine uM            | 42.47 ± 16.27                       | 47.46 ± 12.50                      | 0.32         |
| Lysine uM             | 52.86 ± 16.23                       | 52.43 ± 11.17                      | 0.93         |

|                                |                  |                 |             |
|--------------------------------|------------------|-----------------|-------------|
| Methionine uM                  | 5.47 ± 2.30      | 6.48 ± 3.16     | 0.28        |
| Methylamine uM                 | 2.90 ± 1.34      | 2.41 ± 0.71     | 0.18        |
| Methylsuccinate uM             | 3.97 ± 1.57      | 4.03 ± 1.60     | 0.92        |
| O-Phosphocholine uM            | 19.08 ± 7.94     | 23.81 ± 4.18    | <b>0.03</b> |
| Ornithine uM                   | 39.15 ± 14.70    | 43.73 ± 12.89   | 0.34        |
| Phenylalanine uM               | 20.30 ± 6.12     | 21.49 ± 4.02    | 0.51        |
| Proline uM                     | 51.03 ± 16.42    | 57.91 ± 19.77   | 0.27        |
| Pyruvate uM                    | 7.77 ± 4.46      | 7.36 ± 2.19     | 0.74        |
| Sarcosine uM                   | 3.63 ± 3.47      | 3.52 ± 2.83     | 0.92        |
| Serine uM                      | 35.97 ± 15.91    | 39.75 ± 7.61    | 0.37        |
| sn-Glycero-3-phosphocholine uM | 48.96 ± 32.32    | 73.78 ± 41.62   | 0.06        |
| Succinate uM                   | 11.07 ± 5.05     | 12.79 ± 4.70    | 0.31        |
| Threonine uM                   | 43.17 ± 20.80    | 44.74 ± 10.83   | 0.78        |
| Trimethylamine N-oxide uM      | 6.17 ± 5.62      | 5.32 ± 3.04     | 0.59        |
| Tryptophan uM                  | 18.05 ± 6.78     | 17.69 ± 5.23    | 0.87        |
| Tyrosine uM                    | 31.83 ± 9.63     | 36.66 ± 9.63    | 0.15        |
| Valine uM                      | 91.77 ± 30.27    | 97.77 ± 12.90   | 0.44        |
| IL6 pg/mL                      | 701.84 ± 1006.99 | 396.30 ± 464.41 | 0.27        |
| sIL6R pg/mL                    | 283455 ± 291132  | 400370 ± 376162 | 0.30        |
| IL6/sIL6R                      | 0.005 ± 0.009    | 0.002 ± 0.005   | 0.39        |

---



**Comparison of metabolites' concentration between High Activity DAS28 > 5.1 and moderate activity DAS28 ≤5.1 at baseline.**

| Variables             | Moderate activity | High activity     | P                |
|-----------------------|-------------------|-------------------|------------------|
|                       | (n=9)             | (n=26)            |                  |
| Age                   | 50.50 ± 11.76     | 54.50 ± 10.54     | 0.32             |
| Swollen Joints        | 3.11 ± 2.20       | 7.00 ± 4.13       | <b>0.01</b>      |
| Tender joints         | 2.22 ± 1.79       | 11.69 ± 5.27      | <b>&lt;0.001</b> |
| VAS Patient           | 51.11 ± 5.53      | 73.08 ± 17.51     | <b>&lt;0.001</b> |
| VAS Medic             | 43.78 ± 21.66     | 59.42 ± 20.45     | 0.06             |
| HAQ                   | 1.15 ± 0.58       | 1.50 ± 0.70       | 0.18             |
| SDAI                  | 15.92 ± 4.10      | 34.24 ± 9.05      | <b>&lt;0.001</b> |
| CDAI                  | 14.82 ± 4.17      | 31.94 ± 8.20      | <b>&lt;0.001</b> |
| 3-Hydroxybutyrate uM  | 24.11 ± 17.84     | 18.19 ± 15.71     | 0.35             |
| 5,6-Dihydrothymine uM | 18.82 ± 8.44      | 18.02 ± 9.46      | 0.82             |
| Acetate uM            | 152.12 ± 107.44   | 177.00 ± 100.91   | 0.53             |
| Acetoacetate uM       | 23.66 ± 13.98     | 25.71 ± 22.48     | 0.80             |
| Acetone uM            | 425.12 ± 545.31   | 623.20 ± 1149.56  | 0.62             |
| Adipate uM            | 264.21 ± 298.32   | 237.87 ± 151.04   | 0.73             |
| Alanine uM            | 149.71 ± 7.15     | 136.98 ± 47.78    | 0.54             |
| Arginine uM           | 30.84 ± 18.69     | 23.78 ± 15.24     | 0.27             |
| Betaine uM            | 13.26 ± 8.61      | 8.89 ± 5.31       | 0.08             |
| Butyrate uM           | 16.47 ± 7.48      | 15.20 ± 5.58      | 0.59             |
| Carnitine uM          | 9.59 ± 8.38       | 7.24 ± 6.16       | 0.37             |
| Choline uM            | 9.70 ± 3.24       | 9.41 ± 2.55       | 0.78             |
| Citrate uM            | 8.93 ± 6.20       | 8.01 ± 3.51       | 0.58             |
| Creatine uM           | 11.99 ± 4.66      | 12.30 ± 9.23      | 0.12             |
| Creatine phosphate uM | 24.04 ± 10.26     | 19.66 ± 10.95     | 0.30             |
| Creatinine uM         | 7.29 ± 3.00       | 7.39 ± 3.35       | 0.93             |
| Dimethylamine uM      | 4.09 ± 3.85       | 4.11 ± 3.26       | 0.98             |
| Formate uM            | 47.27 ± 28.25     | 70.53 ± 55.55     | 0.11             |
| Fumarate uM           | 3.53 ± 1.90       | 2.23 ± 1.17       | <b>0.02</b>      |
| Glucose uM            | 583.83 ± 530.51   | 661.12 ± 632.43   | 0.74             |
| Glutamate uM          | 105.90 ± 16.68    | 116.01 ± 31.00    | 0.36             |
| Glutamine uM          | 38.32 ± 25.19     | 36.37 ± 31.95     | 0.87             |
| Glycine uM            | 89.09 ± 27.20     | 94.10 ± 32.54     | 0.68             |
| Isobutyrate uM        | 9.70 ± 2.95       | 8.43 ± 2.47       | 0.21             |
| Isoleucine uM         | 26.33 ± 6.24      | 29.19 ± 8.31      | 0.35             |
| Isovalerate uM        | 12.74 ± 7.89      | 11.25 ± 4.83      | 0.5              |
| Lactate uM            | 3282.56 ± 1636.66 | 3282.80 ± 1335.87 | 1.00             |
| Leucine uM            | 43.86 ± 14.16     | 45.06 ± 15.11     | 0.83             |

|                                |                       |                       |             |
|--------------------------------|-----------------------|-----------------------|-------------|
| Lysine uM                      | 53.51 ± 14.78         | 52.37 ± 13.95         | 0.84        |
| Methionine uM                  | 4.80 ± 1.18           | 6.32 ± 3.02           | 0.15        |
| Methylamine uM                 | 3.10 ± 1.50           | 2.53 ± 0.93           | 0.19        |
| Methylsuccinate uM             | 4.88 ± 1.77           | 3.69 ± 1.39           | <b>0.04</b> |
| O-Phosphocholine uM            | 20.04 ± 6.95          | 21.65 ± 6.89          | 0.55        |
| Ornithine uM                   | 40.44 ± 12.00         | 41.52 ± 14.70         | 0.84        |
| Phenylalanine uM               | 22.58 ± 5.04          | 20.24 ± 5.25          | 0.25        |
| Proline uM                     | 54.28 ± 17.24         | 54.14 ± 18.70         | 0.98        |
| Pyruvate uM                    | 9.31 ± 5.73           | 6.99 ± 2.30           | 0.26        |
| Sarcosine uM                   | 3.16 ± 3.03           | 3.73 ± 3.23           | 0.64        |
| Serine uM                      | 35.32 ± 11.99         | 38.52 ± 13.17         | 0.52        |
| sn-Glycero-3-phosphocholine uM | 52.73 ± 29.61         | 62.92 ± 41.20         | 0.50        |
| Succinate uM                   | 12.96 ± 5.97          | 11.47 ± 4.55          | 0.44        |
| Threonine uM                   | 38.62 ± 12.43         | 45.71 ± 17.88         | 0.28        |
| Trimethylamine N-oxide uM      | 6.33 ± 3.07           | 5.59 ± 5.04           | 0.68        |
| Tryptophan uM                  | 20.17 ± 4.32          | 17.10 ± 6.41          | 0.19        |
| Tyrosine uM                    | 37.37 ± 8.99          | 32.89 ± 9.97          | 0.24        |
| Valine uM                      | 96.00 ± 27.52         | 94.00 ± 22.99         | 0.83        |
| IL6 pg/mL                      | 462.65 ± 735.93       | 596.61 ± 844.89       | 0.67        |
| sIL6R pg/mL                    | 421449.56 ± 457203.18 | 307636.08 ± 276040.52 | 0.49        |
| IL6/sIL6R                      | 0.00 ± 0.00           | 0.00 ± 0.01           | 0.58        |

---

High Activity DAS28 > 5.1 and moderate activity DAS28 ≤5.1

**Comparison of metabolites' concentration between ESR High  $\geq 30$  mm/h vs normal  $< 30$  mm/h at baseline.**

| Variables             | ESR Normal            | ESR High              | P           |
|-----------------------|-----------------------|-----------------------|-------------|
|                       | (n=9)                 | (n= 26)               |             |
| Age                   | 52.44 $\pm$ 9.98      | 53.76 $\pm$ 10.94     | 0.75        |
| Swollen Joints        | 7.33 $\pm$ 4.92       | 5.54 $\pm$ 3.74       | 0.26        |
| Tender joints         | 13.67 $\pm$ 6.91      | 7.73 $\pm$ 5.30       | <b>0.01</b> |
| VAS Patient           | 73.00 $\pm$ 17.85     | 65.50 $\pm$ 18.12     | 0.29        |
| VAS Medic             | 68.67 $\pm$ 14.00     | 50.81 $\pm$ 22.04     | <b>0.03</b> |
| HAQ                   | 1.49 $\pm$ 0.63       | 1.39 $\pm$ 0.71       | 0.71        |
| DAS28                 | 5.71 $\pm$ 1.13       | 5.80 $\pm$ 0.96       | 0.81        |
| SDAI                  | 37.29 $\pm$ 13.72     | 26.85 $\pm$ 9.36      | <b>0.01</b> |
| CDAI                  | 35.17 $\pm$ 11.73     | 24.90 $\pm$ 8.89      | <b>0.01</b> |
| 3-Hydroxybutyrate uM  | 17.05 $\pm$ 12.26     | 20.63 $\pm$ 17.51     | 0.58        |
| 5,6-Dihydrothymine uM | 22.85 $\pm$ 7.00      | 16.62 $\pm$ 9.30      | 0.08        |
| Acetate uM            | 171.33 $\pm$ 91.02    | 170.35 $\pm$ 106.72   | 0.98        |
| Acetoacetate uM       | 26.95 $\pm$ 4.99      | 24.57 $\pm$ 23.66     | 0.63        |
| Acetone uM            | 202.01 $\pm$ 100.73   | 700.43 $\pm$ 1165.10  | 0.21        |
| Adipate uM            | 264.05 $\pm$ 161.55   | 237.92 $\pm$ 207.22   | 0.73        |
| Alanine uM            | 161.09 $\pm$ 54.91    | 133.04 $\pm$ 50.93    | 0.17        |
| Arginine uM           | 15.28 $\pm$ 10.45     | 29.16 $\pm$ 16.45     | <b>0.02</b> |
| Betaine uM            | 13.07 $\pm$ 8.83      | 9.95 $\pm$ 5.24       | 0.10        |
| Butyrate uM           | 16.57 $\pm$ 5.72      | 15.16 $\pm$ 6.20      | 0.55        |
| Carnitine uM          | 10.35 $\pm$ 9.79      | 6.97 $\pm$ 5.30       | 0.34        |
| Choline uM            | 11.22 $\pm$ 1.98      | 8.88 $\pm$ 2.68       | <b>0.02</b> |
| Citrate uM            | 10.16 $\pm$ 4.64      | 7.59 $\pm$ 4.02       | 0.12        |
| Creatine uM           | 13.00 $\pm$ 5.22      | 10.43 $\pm$ 3.16      | 0.08        |
| Creatine phosphate uM | 20.74 $\pm$ 11.34     | 20.80 $\pm$ 10.84     | 0.99        |
| Creatinine uM         | 8.44 $\pm$ 3.72       | 6.99 $\pm$ 3.02       | 0.25        |
| Dimethylamine uM      | 3.91 $\pm$ 1.62       | 4.17 $\pm$ 3.81       | 0.78        |
| Formate uM            | 77.39 $\pm$ 53.13     | 60.10 $\pm$ 50.03     | 0.38        |
| Fumarate uM           | 2.79 $\pm$ 1.73       | 2.49 $\pm$ 1.40       | 0.61        |
| Glucose uM            | 737.52 $\pm$ 568.52   | 607.91 $\pm$ 616.46   | 0.58        |
| Glutamate uM          | 125.22 $\pm$ 19.85    | 109.32 $\pm$ 29.72    | 0.33        |
| Glutamine uM          | 28.03 $\pm$ 29.12     | 39.93 $\pm$ 30.26     | 0.31        |
| Glycine uM            | 103.94 $\pm$ 24.77    | 88.95 $\pm$ 32.34     | 0.21        |
| Isobutyrate uM        | 9.64 $\pm$ 1.03       | 8.44 $\pm$ 2.93       | 0.24        |
| Isoleucine uM         | 32.02 $\pm$ 8.84      | 27.2 $\pm$ 7.24       | 0.11        |
| Isovalerate uM        | 14.23 $\pm$ 4.53      | 10.73 $\pm$ 5.83      | 0.12        |
| Lactate uM            | 3571.67 $\pm$ 1151.03 | 3182.73 $\pm$ 1475.57 | 0.48        |
| Leucine uM            | 54.07 $\pm$ 15.14     | 41.53 $\pm$ 13.32     | <b>0.02</b> |

|                                |                 |                 |      |
|--------------------------------|-----------------|-----------------|------|
| Lysine uM                      | 59.33 ± 11.82   | 50.35 ± 14.09   | 0.09 |
| Methionine uM                  | 6.32 ± 1.78     | 5.79 ± 3.01     | 0.63 |
| Methylamine uM                 | 3.15 ± 1.52     | 2.51 ± 0.91     | 0.26 |
| Methylsuccinate uM             | 4.63 ± 1.40     | 3.77 ± 1.58     | 0.16 |
| O-Phosphocholine uM            | 22.00 ± 4.35    | 20.97 ± 7.57    | 0.70 |
| Ornithine uM                   | 48.13 ± 12.69   | 38.86 ± 13.71   | 0.08 |
| Phenylalanine uM               | 22.64 ± 2.65    | 20.22 ± 5.77    | 0.10 |
| Proline uM                     | 67.02 ± 23.30   | 49.73 ± 13.83   | 0.10 |
| Pyruvate uM                    | 9.01 ± 5.24     | 7.09 ± 2.73     | 0.17 |
| Sarcosine uM                   | 4.4 ± 4.53      | 3.29 ± 2.57     | 0.50 |
| Serine uM                      | 39.37 ± 15.82   | 37.12 ± 11.86   | 0.66 |
| sn-Glycero-3-phosphocholine uM | 69.37 ± 23.79   | 57.16 ± 42.24   | 0.42 |
| Succinate uM                   | 11.61 ± 2.12    | 11.94 ± 5.58    | 0.80 |
| Threonine uM                   | 48.40 ± 15.01   | 42.32 ± 17.34   | 0.36 |
| Trimethylamine N-oxide uM      | 4.63 ± 2.54     | 6.18 ± 5.08     | 0.39 |
| Tryptophan uM                  | 19.98 ± 4.14    | 17.16 ± 6.48    | 0.23 |
| Tyrosine uM                    | 39.22 ± 9.14    | 32.24 ± 9.53    | 0.06 |
| Valine uM                      | 100.9 ± 18.49   | 92.30 ± 25.35   | 0.36 |
| IL6 pg/mL                      | 793.23 ± 841.55 | 482.17 ± 799.64 | 0.33 |
| sIL6R pg/mL                    | 309878 ± 323279 | 346256 ± 335792 | 0.78 |
| IL6/sIL6R                      | 0.005 ± 0.006   | 0.003 ± 0.007   | 0.58 |

---

**Comparison of metabolites' concentration between CRP negative <2.0 mg/L vs positive ≥2.0 mg/L at baseline.**

| Variables             | CRP Negative      | CRP Positive      | P           |
|-----------------------|-------------------|-------------------|-------------|
|                       | (n= 25)           | (n= 10)           |             |
| Age                   | 50.8 ± 10.68      | 60.00 ± 7.18      | <b>0.01</b> |
| Swollen Joints        | 5.44 ± 3.91       | 7.40 ± 4.35       | 0.20        |
| Tender joints         | 9.20 ± 6.60       | 9.40 ± 5.50       | 0.93        |
| VAS Patient           | 65.36 ± 17.61     | 72.60 ± 19.20     | 0.29        |
| VAS Medic             | 51.40 ± 18.95     | 65.40 ± 25.43     | 0.08        |
| HAQ                   | 1.37 ± 0.69       | 1.51 ± 0.68       | 0.59        |
| DAS28                 | 5.63 ± 1.00       | 6.15 ± 0.91       | 0.16        |
| SDAI                  | 28.88 ± 10.03     | 36.16 ± 12.46     | <b>0.03</b> |
| CDAI                  | 26.31 ± 10.00     | 30.60 ± 11.79     | 0.28        |
| 3-Hydroxybutyrate uM  | 20.30 ± 16.79     | 18.24 ± 15.45     | 0.74        |
| 5,6-Dihydrothymine uM | 17.37 ± 10.00     | 20.35 ± 6.22      | 0.29        |
| Acetate uM            | 171.50 ± 113.49   | 168.37 ± 68.16    | 0.92        |
| Acetoacetate uM       | 26.93 ± 23.27     | 20.82 ± 10.36     | 0.43        |
| Acetone uM            | 449.32 ± 423.04   | 879.63 ± 1827.59  | 0.48        |
| Adipate uM            | 256.94 ± 222.79   | 213.90 ± 95.68    | 0.56        |
| Alanine uM            | 143.54 ± 61.38    | 132.00 ± 17.38    | 0.40        |
| Arginine uM           | 22.38 ± 15.10     | 33.63 ± 16.84     | 0.06        |
| Betaine uM            | 9.88 ± 6.64       | 10.34 ± 6.35      | 0.85        |
| Butyrate uM           | 10.55 ± 6.94      | 15.45 ± 2.97      | 0.95        |
| Carnitine uM          | 8.22 ± 7.66       | 6.90 ± 3.74       | 0.50        |
| Choline uM            | 9.90 ± 2.92       | 8.42 ± 1.71       | 0.14        |
| Citrate uM            | 8.25 ± 4.86       | 8.23 ± 2.44       | 0.98        |
| Creatine uM           | 11.38 ± 4.32      | 10.36 ± 2.50      | 0.49        |
| Creatine phosphate uM | 20.34 ± 10.98     | 21.89 ± 10.84     | 0.71        |
| Creatinine uM         | 6.95 ± 3.30       | 8.41 ± 2.88       | 0.23        |
| Dimethylamine uM      | 4.33 ± 3.76       | 3.53 ± 2.12       | 0.53        |
| Formate uM            | 62.72 ± 52.51     | 69.12 ± 47.94     | 0.74        |
| Fumarate uM           | 2.57 ± 1.58       | 2.55 ± 1.23       | 0.96        |
| Glucose uM            | 578.68 ± 573.46   | 797.63 ± 671.28   | 0.34        |
| Glutamate uM          | 111.02 ± 29.91    | 119.39 ± 23.45    | 0.43        |
| Glutamine uM          | 35.31 ± 31.21     | 40.76 ± 27.96     | 0.63        |
| Glycine uM            | 93.40 ± 32.21     | 91.32 ± 29.09     | 0.86        |
| Isobutyrate uM        | 8.93 ± 2.86       | 8.31 ± 1.96       | 0.53        |
| Isoleucine uM         | 27.72 ± 8.75      | 30.29 ± 4.79      | 0.39        |
| Isovalerate uM        | 12.50 ± 6.40      | 9.47 ± 2.27       | <b>0.04</b> |
| Lactate uM            | 3251.23 ± 1513.42 | 3361.51 ± 1104.79 | 0.81        |
| Leucine uM            | 45.12 ± 16.97     | 43.82 ± 6.64      | 0.75        |

|                                |                 |                 |             |
|--------------------------------|-----------------|-----------------|-------------|
| Lysine uM                      | 53.84 ± 15.81   | 49.71 ± 7.42    | 0.30        |
| Methionine uM                  | 5.97 ± 2.60     | 6.29 ± 3.16     | 0.63        |
| Methylamine uM                 | 2.90 ± 1.19     | 2.11 ± 0.57     | <b>0.05</b> |
| Methylsuccinate uM             | 4.27 ± 1.59     | 3.31 ± 1.32     | 0.10        |
| O-Phosphocholine uM            | 20.38 ± 7.57    | 23.39 ± 4.09    | 0.24        |
| Ornithine uM                   | 43.38 ± 15.23   | 35.88 ± 8.14    | 0.06        |
| Phenylalanine uM               | 21.22 ± 5.82    | 19.90 ± 3.38    | 0.51        |
| Proline uM                     | 52.84 ± 20.41   | 55.72 ± 9.55    | 0.92        |
| Pyruvate uM                    | 7.88 ± 4.13     | 6.83 ± 1.18     | 0.25        |
| Sarcosine uM                   | 3.73 ± 3.42     | 3.21 ± 2.43     | 0.66        |
| Serine uM                      | 37.18 ± 14.78   | 38.99 ± 5.65    | 0.60        |
| sn-Glycero-3-phosphocholine uM | 55.68 ± 32.66   | 71.86 ± 50.18   | 0.26        |
| Succinate uM                   | 12.18 ± 5.65    | 11.02 ± 2.07    | 0.38        |
| Threonine uM                   | 45.89 ± 18.63   | 38.87 ± 9.89    | 0.27        |
| Trimethylamine N-oxide uM      | 4.89 ± 3.03     | 8.01 ± 6.86     | 0.07        |
| Tryptophan uM                  | 18.27 ± 6.64    | 16.92 ± 4.29    | 0.56        |
| Tyrosine uM                    | 34.21 ± 11.03   | 33.61 ± 6.16    | 0.87        |
| Valine uM                      | 94.08 ± 27.44   | 95.58 ± 11.57   | 0.82        |
| IL6 pg/mL                      | 608.59 ± 914.14 | 446.08 ± 477.74 | 0.60        |
| sIL6R pg/mL                    | 369000 ± 356762 | 256656 ± 240135 | 0.37        |
| IL6/sIL6R                      | 0.003 ± 0.007   | 0.004 ± 0.005   | 0.95        |

---

**Comparison of metabolites' concentration between RF Positive>25 IU/mL vs negative ≤25 IU/mL at baseline.**

| Variables             | RF Positive       | RF Negative       | P           |
|-----------------------|-------------------|-------------------|-------------|
|                       | (n= 23)           | (n= 12)           |             |
| Age                   | 53.23 ± 10.62     | 54.11 ± 11.640    | 0.83        |
| Swollen Joints        | 6.00 ± 3.71       | 6.00 ± 4.90       | 1.00        |
| Tender joints         | 10.57 ± 6.29      | 6.75 ± 5.53       | 0.08        |
| VAS Patient           | 68.83 ± 18.16     | 64.75 ± 18.47     | 0.53        |
| VAS Medic             | 58.17 ± 20.42     | 50.08 ± 23.65     | 0.30        |
| HAQ                   | 1.43 ± 0.73       | 1.38 ± 0.60       | 0.81        |
| DAS28                 | 5.95 ± 0.92       | 5.45 ± 1.08       | 0.16        |
| SDAI                  | 31.35 ± 11.23     | 26.06 ± 11.42     | 0.20        |
| CDAI                  | 29.27 ± 9.46      | 24.23 ± 12.11     | 0.18        |
| 3-Hydroxybutyrate uM  | 16.97 ± 13.98     | 24.97 ± 19.42     | 0.17        |
| 5,6-Dihydrothymine uM | 17.50 ± 8.75      | 19.63 ± 9.97      | 0.55        |
| Acetate uM            | 154.97 ± 96.43    | 200.57 ± 108.74   | 0.21        |
| Acetoacetate uM       | 24.46 ± 21.38     | 26.58 ± 19.39     | 0.77        |
| Acetone uM            | 689.88 ± 1234.34  | 346.83 ± 334.61   | 0.35        |
| Adipate uM            | 244.62 ± 214.96   | 244.68 ± 156.76   | 0.99        |
| Alanine uM            | 134.76 ± 54.11    | 150.78 ± 50.27    | 0.40        |
| Arginine uM           | 22.47 ± 13.74     | 31.58 ± 19.37     | 0.12        |
| Betaine uM            | 10.27 ± 6.69      | 9.53 ± 6.30       | 0.76        |
| Butyrate uM           | 13.96 ± 5.78      | 18.53 ± 5.55      | <b>0.03</b> |
| Carnitine uM          | 7.80 ± 6.50       | 7.92 ± 7.49       | 0.96        |
| Choline uM            | 9.58 ± 2.84       | 9.30 ± 2.53       | 0.78        |
| Citrate uM            | 8.59 ± 3.53       | 7.60 ± 5.56       | 0.52        |
| Creatine uM           | 10.69 ± 3.84      | 11.87 ± 4.01      | 0.40        |
| Creatine phosphate uM | 19.44 ± 8.95      | 23.36 ± 13.76     | 0.32        |
| Creatinine uM         | 7.54 ± 2.86       | 7.47 ± 4.03       | 0.67        |
| Dimethylamine uM      | 3.57 ± 3.33       | 5.13 ± 3.33       | 0.19        |
| Formate uM            | 59.89 ± 46.99     | 73.48 ± 58.09     | 0.46        |
| Fumarate uM           | 2.83 ± 1.21       | 2.08 ± 1.85       | 0.16        |
| Glucose uM            | 690.33 ± 671.40   | 547.16 ± 448.40   | 0.51        |
| Glutamate uM          | 110.23 ± 27.66    | 119.51 ± 29.27    | 0.36        |
| Glutamine uM          | 38.52 ± 31.82     | 33.71 ± 27.25     | 0.66        |
| Glycine uM            | 95.11 ± 32.50     | 88.39 ± 28.56     | 0.55        |
| Isobutyrate uM        | 8.56 ± 2.82       | 9.13 ± 2.26       | 0.54        |
| Isoleucine uM         | 28.34 ± 6.96      | 28.68 ± 9.66      | 0.91        |
| Isovalerate uM        | 11.71 ± 5.94      | 11.49 ± 5.38      | 0.92        |
| Lactate uM            | 3126.03 ± 1410.75 | 3583.11 ± 1368.84 | 0.36        |
| Leucine uM            | 42.14 ± 12.05     | 49.75 ± 18.27     | 0.15        |

|                                |                       |                       |      |
|--------------------------------|-----------------------|-----------------------|------|
| Lysine uM                      | 52.01 ± 12.61         | 57.66 ± 15.46         | 0.27 |
| Methionine uM                  | 6.03 ± 3.17           | 5.74 ± 1.72           | 0.77 |
| Methylamine uM                 | 2.73 ± 0.98           | 2.58 ± 1.36           | 0.70 |
| Methylsuccinate uM             | 4.08 ± 1.76           | 3.83 ± 1.134          | 0.65 |
| O-Phosphocholine uM            | 20.80 ± 6.97          | 22.09 ± 6.80          | 0.60 |
| Ornithine uM                   | 39.87 ± 14.02         | 43.88 ± 13.86         | 0.43 |
| Phenylalanine uM               | 20.66 ± 6.15          | 21.20 ± 2.92          | 0.77 |
| Proline uM                     | 50.90 ± 13.36         | 60.47 ± 24.26         | 0.14 |
| Pyruvate uM                    | 6.84 ± 2.56           | 9.01 ± 4.76           | 0.09 |
| Sarcosine uM                   | 3.15 ± 3.01           | 4.41 ± 3.37           | 0.27 |
| Serine uM                      | 3.15 ± 3.01           | 4.41 ± 3.37           | 0.02 |
| sn-Glycero-3-phosphocholine uM | 61.20 ± 43.44         | 58.88 ± 27.92         | 0.85 |
| Succinate uM                   | 11.01 ± 5.17          | 13.48 ± 4.06          | 0.16 |
| Threonine uM                   | 40.69 ± 15.83         | 50.02 ± 17.49         | 0.12 |
| Trimethylamine N-oxide uM      | 5.71 ± 5.10           | 5.92 ± 3.58           | 0.90 |
| Tryptophan uM                  | 17.93 ± 6.97          | 17.81 ± 3.95          | 0.96 |
| Tyrosine uM                    | 31.95 ± 9.49          | 38.04 ± 9.49          | 0.08 |
| Valine uM                      | 90.52 ± 21.11         | 102.16 ± 27.67        | 0.17 |
| IL6 pg/mL                      | 595.09 ± 869.92       | 499.05 ± 712.04       | 0.74 |
| sIL6R pg/mL                    | 406337.26 ± 371521.65 | 203818.92 ± 166185.82 | 0.03 |
| IL6/sIL6R                      | 0.004 ± 0.008         | 0.003 ± 0.004         | 0.64 |

---



**Comparison of metabolites' concentration between Anti-CCP Positive  $\geq 20$  vs negative  $< 20$  at baseline.**

| Variables               | Anti-CCP Positive     | Anti-CCP Negative     | P           |
|-------------------------|-----------------------|-----------------------|-------------|
|                         | (n= 23)               | (n= 12)               |             |
| Tobacco positive, n (%) | 5 (21.7)              | 3 (25)                | 1.00        |
| Age                     | 54.60 $\pm$ 10.21     | 51.17 $\pm$ 11.34     | 0.37        |
| Swollen Joints          | 6.30 $\pm$ 3.97       | 5.42 $\pm$ 4.40       | 0.55        |
| Tender joints           | 9.17 $\pm$ 5.79       | 9.42 $\pm$ 7.28       | 0.91        |
| VAS Patient             | 64.22 $\pm$ 16.50     | 73.58 $\pm$ 20.13     | 0.15        |
| VAS Medic               | 53.52 $\pm$ 18.87     | 59.00 $\pm$ 26.58     | 0.48        |
| HAQ                     | 1.40 $\pm$ 0.72       | 1.44 $\pm$ 0.64       | 0.89        |
| DAS28                   | 5.83 $\pm$ 1.04       | 5.67 $\pm$ 0.93       | 0.64        |
| SDAI                    | 29.32 $\pm$ 10.52     | 29.94 $\pm$ 13.45     | 0.88        |
| CDAI                    | 27.25 $\pm$ 9.31      | 28.09 $\pm$ 13.03     | 0.83        |
| 3-Hydroxybutyrate uM    | 19.33 $\pm$ 15.96     | 20.44 $\pm$ 17.43     | 0.85        |
| 5,6-Dihydrothymine uM   | 17.23 $\pm$ 9.44      | 20.13 $\pm$ 8.46      | 0.38        |
| Acetate uM              | 175.17 $\pm$ 107.35   | 161.86 $\pm$ 93.48    | 0.72        |
| Acetoacetate uM         | 29.08 $\pm$ 22.49     | 17.71 $\pm$ 13.74     | 0.12        |
| Acetone uM              | 583.05 $\pm$ 1221.28  | 551.60 $\pm$ 509.64   | 0.93        |
| Adipate uM              | 225.33 $\pm$ 207.96   | 281.66 $\pm$ 167.98   | 0.42        |
| Alanine uM              | 141.46 $\pm$ 50.41    | 137.93 $\pm$ 58.95    | 0.85        |
| Arginine uM             | 26.97 $\pm$ 12.58     | 22.96 $\pm$ 20.00     | 0.57        |
| Betaine uM              | 10.61 $\pm$ 7.16      | 8.88 $\pm$ 4.97       | 0.46        |
| Butyrate uM             | 15.47 $\pm$ 5.54      | 15.63 $\pm$ 7.15      | 0.94        |
| Carnitine uM            | 9.48 $\pm$ 6.95       | 4.71 $\pm$ 5.25       | <b>0.04</b> |
| Choline uM              | 10.07 $\pm$ 2.23      | 8.35 $\pm$ 3.23       | 0.07        |
| Citrate uM              | 9.00 $\pm$ 4.51       | 6.82 $\pm$ 3.52       | 0.15        |
| Creatine uM             | 12.22 $\pm$ 3.78      | 8.93 $\pm$ 3.22       | <b>0.02</b> |
| Creatine phosphate uM   | 22.26 $\pm$ 9.20      | 17.96 $\pm$ 13.35     | 0.33        |
| Creatinine uM           | 7.17 $\pm$ 2.85       | 7.74 $\pm$ 3.95       | 0.62        |
| Dimethylamine uM        | 4.32 $\pm$ 3.90       | 3.69 $\pm$ 2.07       | 0.61        |
| Formate uM              | 56.16 $\pm$ 39.48     | 80.63 $\pm$ 66.16     | 0.26        |
| Fumarate uM             | 2.76 $\pm$ 1.52       | 2.21 $\pm$ 1.37       | 0.30        |
| Glucose uM              | 698.50 $\pm$ 616.99   | 531.50 $\pm$ 579.63   | 0.44        |
| Glutamate uM            | 112.61 $\pm$ 27.44    | 114.94 $\pm$ 30.64    | 0.82        |
| Glutamine uM            | 39.63 $\pm$ 31.62     | 31.57 $\pm$ 27.16     | 0.45        |
| Glycine uM              | 100.54 $\pm$ 28.60    | 77.99 $\pm$ 30.98     | <b>0.03</b> |
| Isobutyrate uM          | 9.42 $\pm$ 2.39       | 7.48 $\pm$ 2.67       | <b>0.03</b> |
| Isoleucine uM           | 28.18 $\pm$ 6.27      | 28.98 $\pm$ 10.55     | 0.81        |
| Isovalerate uM          | 12.30 $\pm$ 5.58      | 10.37 $\pm$ 5.89      | 0.35        |
| Lactate uM              | 3288.92 $\pm$ 1463.73 | 3270.89 $\pm$ 1310.98 | 0.97        |

|                                |                       |                       |       |
|--------------------------------|-----------------------|-----------------------|-------|
| Leucine uM                     | 44.94 ± 12.63         | 44.39 ± 18.61         | 0.92  |
| Lysine uM                      | 54.04 ± 11.27         | 50.02 ± 18.33         | 0.42  |
| Methionine uM                  | 5.57 ± 2.20           | 6.63 ± 3.56           | 0.28  |
| Methylamine uM                 | 3.04 ± 1.17           | 1.98 ± 0.49           | <0.01 |
| Methylsuccinate uM             | 4.17 ± 1.75           | 3.65 ± 1.10           | 0.29  |
| O-Phosphocholine uM            | 22.64 ± 5.72          | 18.56 ± 8.21          | 0.09  |
| Ornithine uM                   | 41.88 ± 12.59         | 40.02 ± 16.65         | 0.71  |
| Phenylalanine uM               | 21.84 ± 4.81          | 18.93 ± 5.66          | 0.12  |
| Proline uM                     | 53.64 ± 11.11         | 55.20 ± 27.62         | 0.85  |
| Pyruvate uM                    | 7.71 ± 4.14           | 7.34 ± 2.19           | 0.77  |
| Sarcosine                      | 3.82 ± 2.88           | 3.12 ± 3.71           | 0.54  |
| Serine uM                      | 36.36 ± 9.05          | 40.27 ± 18.17         | 0.49  |
| sn-Glycero-3-phosphocholine uM | 67.77 ± 39.53         | 45.99 ± 33.05         | 0.11  |
| Succinate uM                   | 12.36 ± 5.47          | 10.89 ± 3.58          | 0.41  |
| Threonine uM                   | 42.84 ± 16.95         | 45.90 ± 16.98         | 0.61  |
| Trimethylamine N-oxide uM      | 5.99 ± 5.16           | 5.39 ± 3.38           | 0.72  |
| Tryptophan uM                  | 18.45 ± 6.53          | 16.81 ± 5.06          | 0.45  |
| Tyrosine uM                    | 34.52 ± 8.04          | 33.13 ± 12.88         | 0.69  |
| Valine uM                      | 96.59 ± 16.43         | 90.53 ± 34.47         | 0.57  |
| IL6 pg/mL                      | 701.69 ± 932.66       | 294.73 ± 410.73       | 0.16  |
| sIL6R pg/mL                    | 351055.91 ± 355418.51 | 309774.83 ± 281442.92 | 0.73  |
| IL6/sIL6R                      | 0.00 ± 0.01           | 0.00 ± 0.00           | 0.04  |

---

**Comparison of metabolites' concentration between women and men at baseline.**

| <b>Variables</b>               | <b>Female<br/>(n=35)</b> | <b>Male<br/>(n=5)</b> | <b>P</b>    |
|--------------------------------|--------------------------|-----------------------|-------------|
| Age                            | 53.43 ± 10.58            | 54.00 ± 14.02         | 0.91        |
| Swollen Joints                 | 6 ± 4.08                 | 9.20 ± 7.98           | 0.16        |
| Tender joints                  | 9.26 ± 6.23              | 11.80 ± 9.01          | 0.42        |
| VAS Patient                    | 67.43 ± 18.09            | 77.60 ± 14.79         | 0.24        |
| VAS Medic                      | 55.40 ± 21.58            | 63.6 ± 25.78          | 0.44        |
| HAQ                            | 1.41 ± 0.68              | 1.32 ± 0.37           | 0.78        |
| DAS28                          | 5.77 ± 0.99              | 6.04 ± 1.19           | 0.58        |
| SDAI                           | 29.53 ± 11.41            | 37.03 ± 19.33         | 0.22        |
| CDAI                           | 27.54 ± 10.54            | 35.12 ± 18.41         | 0.41        |
| Diabetes mellitus II, n (%)    | 3 (8.6)                  | 1 (20)                | 0.43        |
| Hypertention, n (%)            | 8 (22.9)                 | 2 (40)                | 0.58        |
| Dyslipidemia, n (%)            | 7 (20)                   | 1 (20)                | 1.00        |
| Tocilizumab monotherapy, n (%) | 24 (68.6)                | 2 (40)                | 0.32        |
| Methotrexate, n (%)            | 16 (45.7)                | 2 (40)                | 1.00        |
| Leflunomide, n (%)             | 8 (22.9)                 | 0 (0)                 | 0.56        |
| Sulfasalazine, n (%)           | 2 (5.7)                  | 0(0)                  | 1.00        |
| Corticoides, n (%)             | 24 (68.6)                | 3 (60)                | 1.00        |
| 3-Hydroxybutyrate uM           | 19.71 ± 16.22            | 16.40 ± 2.90          | 0.28        |
| 5,6-Dihydrothymine uM          | 18.26 ± 8.97             | 26.74 ± 7.85          | <b>0.05</b> |
| Acetate uM                     | 171.59 ± 10.32           | 211.22 ± 72.69        | 0.40        |
| Acetoacetate uM                | 25.23 ± 20.16            | 32.10 ± 22.56         | 0.49        |
| Acetone uM                     | 572.99 ± 1009.66         | 2558.72 ± 4461.44     | 0.38        |
| Adipate uM                     | 242.63 ± 192.13 ±        | 263.86 ± 154.40       | 0.83        |
| Alanine uM                     | 139.78 ± 51.92           | 153.42 ± 28.18        | 0.59        |
| Arginine uM                    | 25.43 ± 16.01            | 22.50± 9.11           | 0.68        |
| Betaine uM                     | 10.15 ± 6.43             | 11.44 ± 5.95          | 0.64        |
| Butyrate uM                    | 15.43 ± 5.97             | 17.12 ± 6.30          | 0.58        |
| Carnitine uM                   | 7.65 ± 6.75              | 4.46 ± 6.31           | 0.30        |
| Choline uM                     | 9.44 ± 2.68              | 9.96 ± 2.43           | 0.71        |
| Citrate uM                     | 8.33 ± 4.24              | 12.12 ± 8.02          | 0.34        |
| Creatine uM                    | 11.08 ± 3.83             | 20.10 ± 20.84         | 0.39        |
| Creatine phosphate uM          | 20.84 ± 10.65            | 24.44 ± 11.57         | 0.49        |
| Creatinine uM                  | 7.39 ± 3.18              | 9.68 ± 2.51           | 0.13        |
| Dimethylamine uM               | 4.13 ± 3.32              | 5.28 ± 4.05           | 0.48        |
| Formate uM                     | 65.20 ± 50.06            | 76.36 ± 54.53         | 0.63        |
| Fumarate uM                    | 2.56 ± 1.45              | 2.42 ± 0.76           | 0.83        |
| Glucose uM                     | 631.90 ± 595.23          | 313.84 ± 192.42       | 0.24        |
| Glutamate uM                   | 113.20 ± 27.77           | 138.28 ± 23.08        | <b>0.07</b> |

|                                |                  |                  |                 |
|--------------------------------|------------------|------------------|-----------------|
| Glutamine uM                   | 37.75 ±30.05     | 52.20 ±28.55     | 0.29            |
| Glycine uM                     | 92.83 ±30.50     | 76.02 ±13.75     | <b>0.05</b>     |
| Isobutyrate uM                 | 8.79 ± 2.59      | 9.00 ±1.03       | 0.84            |
| Isoleucine uM                  | 28.41 ± 7.74     | 34.32 ± 3.40     | 0.10            |
| Isovalerate uM                 | 11.59 ±5.60      | 11.90 ± 3.70     | 0.92            |
| Lactate uM                     | 3286.50 ±1373.85 | 4858.74 ±1242.17 | <b>0.02</b>     |
| Leucine uM                     | 44.42 ±14.60     | 48.12 ±9.64      | 0.62            |
| Lysine uM                      | 53.08 ± 13.97    | 63.28 ± 8.13     | 0.11            |
| Methionine uM                  | 5.85 ± 2.74      | 15.66 ± 23.19    | 0.40            |
| Methylamine uM                 | 2.70 ± 1.10      | 2.54 ± 0.76      | 0.79            |
| Methylsuccinate uM             | 3.98 ± 1.54      | 3.76 ± 1.07      | 0.75            |
| O-Phosphocholine uM            | 21.04 ± 6.85     | 20.86 ± 1.74     | 0.90            |
| Ornithine uM                   | 41.47 ± 13.76    | 54.64 ± 14.98    | <b>0.05</b>     |
| Phenylalanine uM               | 20.86 ± 5.15     | 28.34 ± 11.88    | 0.23            |
| Proline uM                     | 53.78 ± 17.98    | 50.40 ±16.83     | 0.66            |
| Pyruvate uM                    | 7.61 ± 3.51      | 26.60 ±43.61     | 0.38            |
| Serine uM                      | 38.12 ±12.84     | 38.64 ± 12.90    | 0.88            |
| sn-Glycero-3-phosphocholine uM | 59.38 ±38.25     | 32.08 ± 14.28    | 0.11            |
| Succinate uM                   | 11.83 ± 4.83     | 19.36 ± 4.87     | <b>&lt;0.01</b> |
| Threonine uM                   | 43.55 ± 16.65    | 37.92 ± 8.01     | 0.44            |
| Trimethylamine N-oxide uM      | 5.70 ±4.55       | 4.90 ± 1.70      | 0.67            |
| Tryptophan uM                  | 17.75 ± 6.01     | 19.44 ± 5.28     | 0.59            |
| Tyrosine uM                    | 33.93 ± 9.68     | 36.48 ± 6.74     | 0.59            |
| Valine uM                      | 94.89 ± 23.59    | 112.28 ± 26.46   | 0.13            |

---

**Comparison of metabolites' concentration between patients with and without diabetes and mellitus type 2 at baseline.**

| <b>Variables</b>      | <b>No<br/>n= 32</b> | <b>Yes<br/>n=3</b> | <b>p</b>        |
|-----------------------|---------------------|--------------------|-----------------|
| 3-Hydroxybutyrate uM  | 18.31± 15.513       | 34.63 ± 19.53      | 0.10            |
| 5,6-Dihydrothymine uM | 18.85 ± 8.96        | 11.60 ± 9.46       | 0.19            |
| Acetate uM            | 175.64 ± 102.44     | 116.93 ± 90.29     | 0.35            |
| Acetoacetate uM       | 24.78 ± 19.88       | 24.80 ± 4.45       | 1.00            |
| Acetone uM            | 607.64 ± 1065.93    | 194.93 ± 32.18     | 0.51            |
| Adipate uM            | 255.05 ± 200.49     | 133.67 ± 13.37     | 0.31            |
| Alanine uM            | 143.01 ± 53.97      | 110.80 ± 23.14     | 0.32            |
| Arginine uM           | 25.51 ± 16.661      | 29.00 ± 3.14       | 0.33            |
| Betaine uM            | 10.61 ± 6.40        | 8.03 ± 4.40        | 0.50            |
| Butyrate uM           | 15.45 ± 6.25        | 16.33 ± 3.54       | 0.81            |
| Carnitine uM          | 7.66 ± 6.78         | 9.80 ± 7.31        | 0.61            |
| Choline uM            | 9.51 ± 2.82         | 9.20 ± 0.56        | 0.85            |
| Citrate uM            | 9.28 ± 3.58         | 7.80 ± 3.38        | 0.50            |
| Creatine uM           | 10.88 ± 3.99        | 13.33 ± 1.27       | 0.30            |
| Creatine phosphate uM | 21.38 ± 10.94       | 14.50 ± 8.10       | 0.30            |
| Creatinine uM         | 7.27 ± 3.18         | 8.37 ± 4.27        | 0.58            |
| Dimethylamine uM      | 4.40 ± 3.35         | 1.20 ± 0.90        | 0.11            |
| Formate uM            | 67.01 ± 52.25       | 38.27 ± 11.44      | 0.36            |
| Fumarate uM           | 2.56 ± 1.52         | 2.67 ± 1.19        | 0.91            |
| Glucose uM            | 535.94 ± 475.36     | 1764.43 ± 757.01   | <b>&lt;0.01</b> |
| Glutamate uM          | 114.32 ± 29.05      | 103.77 ± 15.05     | 0.54            |
| Glutamine uM          | 36.71 ± 30.76       | 38.57 ± 25.27      | 0.92            |
| Glycine uM            | 91.80 ± 29.90       | 103.53 ± 47.31     | 0.54            |
| Isobutyrate uM        | 8.74 ± 2.72         | 8.87 ± 1.46        | 0.94            |
| Isoleucine uM         | 28.20 ± 8.05        | 31.17 ± 5.49       | 0.54            |
| Isovalerate uM        | 11.75 ± 5.88        | 10.40 ± 3.03       | 0.70            |
| Lactate uM            | 3408.46 ± 1348.77   | 1348.77            | 0.08            |
| Leucine uM            | 45.32 ± 15.08       | 38.67 ± 8.55       | 0.46            |
| Lysine uM             | 53.25 ± 14.32       | 46.43 ± 8.19       | 0.43            |
| Methionine uM         | 6.10 ± 2.80         | 4.17 ± 0.35        | 0.25            |
| Methylamine uM        | 2.73 ± 1.13         | 2.17 ± 0.91        | 0.41            |
| Methylsuccinate uM    | 4.16 ± 1.50         | 2.20 ± 1.15        | <b>0.04</b>     |
| O-Phosphocholine uM   | 20.96 ± 7.00        | 24.27 ± 4.61       | 0.43            |
| Ornithine uM          | 42.33 ± 13.08       | 29.63 ± 20.20      | 0.13            |
| Phenylalanine uM      | 21.22 ± 5.03        | 16.80 ± 6.71       | 0.16            |
| Proline uM            | 54.50 ± 18.70       | 50.77 ± 11.12      | 0.74            |
| Pyruvate uM           | 7.85 ± 3.59         | 4.73 ± 1.50        | 0.15            |

|                                |               |               |      |
|--------------------------------|---------------|---------------|------|
| Serine uM                      | 38.25 ± 13.12 | 31.87 ± 7.34  | 0.42 |
| sn-Glycero-3-phosphocholine uM | 56.93 ± 37.01 | 96.30 ± 41.45 | 0.09 |
| Succinate uM                   | 12.29 ± 4.85  | 7.23 ± 2.86   | 0.09 |
| Threonine uM                   | 44.02 ± 17.44 | 42.47 ± 8.18  | 0.88 |
| Trimethylamine N-oxide uM      | 5.74 ± 4.76   | 6.27 ± 2.36   | 0.85 |
| Tryptophan uM                  | 17.98 ± 6.27  | 16.87 ± 2.76  | 0.77 |
| Tyrosine uM                    | 34.43 ± 9.94  | 29.90 ± 8.49  | 0.45 |
| Valine uM                      | 94.78 ± 24.75 | 91.70 ± 11.75 | 0.83 |

---

**Comparison of metabolites' concentration between patients with and without hypertension at baseline.**

| <b>Variables</b>      | <b>No<br/>n= 27</b> | <b>Yes<br/>n= 8</b> | <b>p</b> |
|-----------------------|---------------------|---------------------|----------|
| 3-Hydroxybutyrate uM  | 19.6 ± 15.33        | 20.10 ± 20.14       | 0.94     |
| 5,6-Dihydrothymine uM | 19.63 ± 8.42        | 13.50 ± 10.29       | 0.09     |
| Acetate uM            | 170.52 ± 96.11      | 170.90 ± 125.86     | 0.99     |
| Acetoacetate uM       | 22.47 ± 16.70       | 32.59 ± 25.09       | 0.19     |
| Acetone uM            | 376.40 ± 415.92     | 1233.33 ± 1951.15   | 0.26     |
| Adipate uM            | 235.38 ± 205.10     | 275.90 ± 161.68     | 0.61     |
| Alanine uM            | 139.68 ± 59.21      | 142.19 ± 20.88      | 0.86     |
| Arginine uM           | 23.08 ± 13.93       | 35.01 ± 19.59       | 0.06     |
| Betaine uM            | 10.58 ± 6.38        | 9.73 ± 6.17         | 0.74     |
| Butyrate uM           | 14.64 ± 6.10        | 18.50 ± 5.05        | 0.11     |
| Carnitine uM          | 8.04 ± 7.18         | 7.18 ± 5.35         | 0.76     |
| Choline uM            | 9.69 ± 2.72         | 8.80 ± 2.69         | 0.42     |
| Citrate uM            | 9.67 ± 3.72         | 7.41 ± 2.24         | 0.11     |
| Creatine uM           | 11.21 ± 4.25        | 10.69 ± 2.44        | 0.74     |
| Creatine phosphate uM | 19.91 ± 10.83       | 23.73 ± 10.87       | 0.39     |
| Creatinine uM         | 7.02 ± 3.19         | 8.53 ± 3.25         | 0.25     |
| Dimethylamine uM      | 3.94 ± 2.73         | 4.76 ± 5.07         | 0.67     |
| Formate uM            | 59.17 ± 46.63       | 82.71 ± 62.35       | 0.25     |
| Fumarate uM           | 2.55 ± 1.50         | 2.63 ± 1.50         | 0.90     |
| Glucose uM            | 610.29 ± 607.70     | 745.73 ± 606.57     | 0.58     |
| Glutamate uM          | 110.68 ± 26.66      | 122.63 ± 32.89      | 0.30     |
| Glutamine uM          | 36.13 ± 27.95       | 39.36 ± 38.27       | 0.79     |
| Glycine uM            | 93.86 ± 33.39       | 89.28 ± 22.18       | 0.72     |
| Isobutyrate uM        | 8.74 ± 2.65         | 8.80 ± 2.69         | 0.96     |
| Isoleucine uM         | 27.82 ± 8.67        | 30.60 ± 3.59        | 0.20     |
| Isovalerate uM        | 11.49 ± 6.17        | 12.13 ± 3.83        | 0.79     |
| Lactate uM            | 3228.58 ± 1412.93   | 3465.53 ± 1403.63   | 0.68     |
| Leucine uM            | 43.85 ± 15.00       | 47.80 ± 14.00       | 0.51     |
| Lysine uM             | 52.35 ± 14.67       | 53.71 ± 12.01       | 0.81     |
| Methionine uM         | 5.28 ± 2.01         | 8.13 ± 3.76         | 0.07     |
| Methylamine uM        | 2.72 ± 1.18         | 2.53 ± 0.89         | 0.67     |
| Methylsuccinate uM    | 4.07 ± 1.51         | 3.75 ± 1.82         | 0.62     |
| O-Phosphocholine uM   | 20.88 ± 7.39        | 22.45 ± 4.72        | 0.58     |
| Ornithine uM          | 41.85 ± 14.24       | 39.19 ± 13.34       | 0.64     |
| Phenylalanine uM      | 20.86 ± 5.66        | 20.79 ± 3.72        | 0.97     |
| Proline uM            | 53.13 ± 19.28       | 57.70 ± 13.79       | 0.54     |
| Pyruvate uM           | 7.70 ± 3.91         | 7.21 ± 2.12         | 0.74     |

|                                |               |                |      |
|--------------------------------|---------------|----------------|------|
| Serine uM                      | 36.33 ± 13.63 | 42.34 ± 8.46   | 0.25 |
| sn-Glycero-3-phosphocholine uM | 58.77 ± 41.31 | 65.46 ± 28.03  | 0.67 |
| Succinate uM                   | 11.73 ± 5.08  | 12.29 ± 4.53   | 0.78 |
| Threonine uM                   | 43.21 ± 17.98 | 46.16 ± 12.55  | 0.67 |
| Trimethylamine N-oxide uM      | 5.63 ± 5.04   | 6.31 ± 2.72    | 0.72 |
| Tryptophan uM                  | 18.57 ± 6.50  | 15.59 ± 3.52   | 0.23 |
| Tyrosine uM                    | 33.76 ± 10.56 | 34.99 ± 7.13   | 0.76 |
| Valine uM                      | 91.33 ± 23.07 | 105.24 ± 24.70 | 0.15 |

---



**Comparison of metabolites' concentration between patients with and without dyslipidemia at baseline.**

| <b>Variables</b>      | <b>No<br/>n=28</b> | <b>Yes<br/>n= 7</b> | <b>p</b>    |
|-----------------------|--------------------|---------------------|-------------|
| 3-Hydroxybutyrate uM  | 16.30 ± 12.97      | 33.37 ± 2.50        | 0.08        |
| 5,6-Dihydrothymine uM | 19.25 ± 8.55       | 14.13 ± 10.74       | 0.19        |
| Acetate uM            | 177.98 ± 101.03    | 141.13 ± 106.33     | 0.40        |
| Acetoacetate uM       | 22.36 ± 18.97      | 34.49 ± 17.04       | 0.13        |
| Acetone uM            | 585.97 ± 1123.57   | 517.46 ± 511.12     | 0.88        |
| Adipate uM            | 254.44 ± 213.70    | 205.44 ± 82.05      | 0.56        |
| Alanine uM            | 139.97 ± 57.98     | 141.39 ± 23.97      | 0.95        |
| Arginine uM           | 23.09 ± 14.01      | 36.66 ± 19.49       | <b>0.04</b> |
| Betaine uM            | 11.20 ± 6.49       | 7.11 ± 4.01         | 0.12        |
| Butyrate uM           | 14.58 ± 5.94       | 19.30 ± 5.17        | 0.06        |
| Carnitine uM          | 7.90 ± 7.09        | 7.60 ± 5.58         | 0.92        |
| Choline uM            | 9.88 ± 2.80        | 7.91 ± 1.56         | 0.09        |
| Citrate uM            | 9.31 ± 3.71        | 8.53 ± 2.91         | 0.61        |
| Creatine uM           | 11.14 ± 4.17       | 10.90 ± 2.66        | 0.89        |
| Creatine phosphate uM | 19.49 ± 10.56      | 25.96 ± 10.96       | 0.16        |
| Creatinine uM         | 7.45 ± 3.32        | 7.04 ± 3.02         | 0.77        |
| Dimethylamine uM      | 4.22 ± 3.17        | 3.76 ± 4.21         | 0.75        |
| Formate uM            | 65.05 ± 52.53      | 62.53 ± 45.87       | 0.91        |
| Fumarate uM           | 2.56 ± 1.47        | 2.61 ± 1.61         | 0.93        |
| Glucose uM            | 529.63 ± 473.03    | 1087.69 ± 866.53    | 0.15        |
| Glutamate uM          | 114.76 ± 28.36     | 108.03 ± 28.77      | 0.58        |
| Glutamine uM          | 35.59 ± 31.47      | 41.99 ± 24.71       | 0.62        |
| Glycine uM            | 92.52 ± 31.78      | 93.96 ± 29.65       | 0.92        |
| Isobutyrate uM        | 8.68 ± 2.62        | 9.06 ± 2.82         | 0.74        |
| Isoleucine uM         | 27.98 ± 8.41       | 30.39 ± 4.99        | 0.48        |
| Isovalerate uM        | 11.62 ± 6.11       | 11.69 ± 3.80        | 0.98        |
| Lactate uM            | 3320.24 ± 1331.96  | 3132.73 ± 1729.39   | 0.76        |
| Leucine uM            | 44.73 ± 14.75      | 44.83 ± 15.54       | 1.00        |
| Lysine uM             | 51.95 ± 14.34      | 55.51 ± 12.89       | 0.55        |
| Methionine uM         | 5.67 ± 2.44        | 6.99 ± 3.74         | 0.26        |
| Methylamine uM        | 2.66 ± 1.19        | 2.76 ± 0.76         | 0.84        |
| Methylsuccinate uM    | 4.14 ± 1.49        | 3.41 ± 1.83         | 0.28        |
| O-Phosphocholine uM   | 20.74 ± 7.13       | 23.24 ± 5.53        | 0.40        |
| Ornithine uM          | 42.65 ± 12.37      | 35.60 ± 18.96       | 0.24        |
| Phenylalanine uM      | 20.93 ± 5.35       | 20.50 ± 5.07        | 0.85        |
| Proline uM            | 53.56 ± 18.96      | 56.66 ± 15.11       | 0.69        |
| Pyruvate uM           | 7.53 ± 3.78        | 7.83 ± 2.72         | 0.84        |

|                                |               |                |      |
|--------------------------------|---------------|----------------|------|
| Serine uM                      | 36.33 ± 13.74 | 43.20 ± 5.64   | 0.21 |
| sn-Glycero-3-phosphocholine uM | 56.81 ± 37.88 | 74.29 ± 40.17  | 0.29 |
| Succinate uM                   | 11.69 ± 4.72  | 12.53 ± 5.93   | 0.69 |
| Threonine uM                   | 42.98 ± 17.72 | 47.51 ± 12.74  | 0.53 |
| Trimethylamine N-oxide uM      | 5.55 ± 4.96   | 6.73 ± 2.62    | 0.55 |
| Tryptophan uM                  | 18.34 ± 6.47  | 16.09 ± 3.70   | 0.39 |
| Tyrosine uM                    | 33.84 ± 10.28 | 34.86 ± 8.19   | 0.39 |
| Valine uM                      | 91.4 ± 22.57  | 106.97 ± 26.42 | 0.12 |

---

**Comparison of metabolites' concentration between metabolites at baseline vs at 6 months in non responders.**

| Variables             | Non-Responders<br>Baseline |         | Non-Responders 6<br>months |         | p               |
|-----------------------|----------------------------|---------|----------------------------|---------|-----------------|
|                       | n=18                       |         | n=18                       |         |                 |
|                       | Mean                       | ±SD     | Mean                       | ±SD     |                 |
| 3-Hydroxybutyrate uM  | 12.96                      | 7.57    | 20.92                      | 19.24   | 0.11            |
| 5,6-Dihydrothymine uM | 17.25                      | 8.29    | 22.44                      | 8.81    | 0.08            |
| Acetate uM            | 177.99                     | 112.89  | 140.83                     | 74.55   | 0.25            |
| Acetoacetate uM       | 21.19                      | 21.52   | 23.15                      | 8.87    | 0.72            |
| Acetone uM            | 795.52                     | 1365.32 | 203.01                     | 125.70  | 0.08            |
| Adipate uM            | 280.41                     | 256.80  | 201.13                     | 66.17   | 0.22            |
| Alanine uM            | 132.79                     | 50.44   | 190.36                     | 56.32   | <b>&lt;0.01</b> |
| Arginine uM           | 23.36                      | 14.45   | 32.64                      | 16.32   | 0.08            |
| Betaine uM            | 9.78                       | 5.50    | 11.78                      | 6.01    | 0.31            |
| Butyrate uM           | 14.33                      | 6.37    | 15.09                      | 5.93    | 0.71            |
| Carnitine uM          | 5.99                       | 4.34    | 6.07                       | 5.51    | 0.96            |
| Choline uM            | 9.11                       | 3.04    | 11.44                      | 2.85    | <b>0.02</b>     |
| Citrate uM            | 8.73                       | 3.02    | 10.36                      | 3.01    | 0.11            |
| Creatine uM           | 10.38                      | 3.22    | 12.98                      | 2.76    | <b>0.01</b>     |
| Creatine phosphate uM | 19.42                      | 11.43   | 21.93                      | 9.10    | 0.47            |
| Creatinine uM         | 7.17                       | 2.83    | 8.53                       | 3.26    | 0.19            |
| Dimethylamine uM      | 4.27                       | 3.78    | 3.46                       | 1.56    | 0.41            |
| Formate uM            | 70.54                      | 61.24   | 59.65                      | 35.59   | 0.52            |
| Fumarate uM           | 2.46                       | 1.53    | 2.49                       | 0.83    | 0.94            |
| Glucose uM            | 518.00                     | 579.41  | 494.46                     | 251.06  | 0.88            |
| Glutamate uM          | 107.79                     | 29.51   | 127.29                     | 46.11   | 0.14            |
| Glutamine uM          | 41.14                      | 33.85   | 50.56                      | 23.85   | 0.34            |
| Glycine uM            | 88.06                      | 32.77   | 113.73                     | 30.92   | <b>0.02</b>     |
| Isobutyrate uM        | 7.79                       | 2.60    | 9.40                       | 3.11    | 0.10            |
| Isoleucine uM         | 27.11                      | 8.99    | 32.54                      | 7.67    | 0.06            |
| Isovalerate uM        | 10.22                      | 5.49    | 12.86                      | 4.71    | 0.13            |
| Lactate uM            | 3141.23                    | 1205.69 | 3977.79                    | 1066.96 | <b>0.03</b>     |
| Leucine uM            | 41.29                      | 15.17   | 53.12                      | 14.67   | <b>0.02</b>     |
| Lysine uM             | 48.22                      | 13.96   | 60.92                      | 12.20   | <b>0.01</b>     |
| Methionine uM         | 5.81                       | 2.76    | 5.72                       | 2.47    | 0.92            |
| Methylamine uM        | 2.44                       | 0.93    | 2.72                       | 0.93    | 0.38            |
| Methulsuccinate uM    | 3.99                       | 1.70    | 4.19                       | 2.63    | 0.79            |
| O-Phosphocholine uM   | 19.16                      | 7.81    | 21.82                      | 4.23    | 0.21            |

|                                |       |       |        |       |             |
|--------------------------------|-------|-------|--------|-------|-------------|
| Ornithine uM                   | 38.37 | 14.36 | 44.97  | 13.26 | 0.16        |
| Phenylalanine uM               | 18.92 | 5.18  | 22.50  | 8.73  | 0.14        |
| Proline uM                     | 49.77 | 14.88 | 70.60  | 24.96 | <b>0.01</b> |
| Pyruvate uM                    | 6.91  | 2.02  | 7.56   | 2.28  | 0.38        |
| Serine uM                      | 38.08 | 16.14 | 50.48  | 20.06 | <b>0.05</b> |
| sn-Glycero-3-phosphocholine uM | 46.29 | 29.99 | 51.02  | 23.93 | 0.60        |
| Succinate uM                   | 11.39 | 5.02  | 13.25  | 6.87  | 0.36        |
| Threonine uM                   | 41.26 | 19.59 | 54.33  | 17.22 | <b>0.04</b> |
| Trimethylamine N-oxide uM      | 5.82  | 5.85  | 4.91   | 3.90  | 0.59        |
| Tryptophan uM                  | 15.54 | 6.46  | 19.47  | 5.03  | <b>0.05</b> |
| Tyrosine uM                    | 30.64 | 10.35 | 38.11  | 7.07  | <b>0.02</b> |
| Valine uM                      | 88.78 | 24.94 | 109.11 | 20.00 | <b>0.01</b> |

---

**Comparison of metabolites' concentration between metabolites at baseline vs at 6 months in responders.**

| Variables             | Responders Baseline |         | Responders 6 months |        | p               |
|-----------------------|---------------------|---------|---------------------|--------|-----------------|
|                       | n=17                |         | n=17                |        |                 |
|                       | Mean                | ±SD     | Mean                | ±SD    |                 |
| 3-Hydroxybutyrate uM  | 26.86               | 19.82   | 22.06               | 14.28  | 0.42            |
| 5,6-Dihydrothymine uM | 19.26               | 10.03   | 20.04               | 10.57  | 0.83            |
| Acetate uM            | 162.78              | 90.96   | 146.79              | 56.75  | 0.54            |
| Acetoacetate uM       | 28.58               | 15.68   | 32.42               | 19.30  | 0.53            |
| Acetone uM            | 335.88              | 365.87  | 540.15              | 536.58 | 0.20            |
| Adipate uM            | 206.78              | 86.01   | 288.02              | 289.55 | 0.28            |
| Alanine uM            | 148.15              | 55.30   | 185.23              | 38.61  | <b>0.03</b>     |
| Arginine uM           | 28.39               | 17.39   | 31.32               | 13.41  | 0.59            |
| Betaine uM            | 11.02               | 7.07    | 11.51               | 7.98   | 0.85            |
| Butyrate uM           | 16.78               | 5.56    | 16.85               | 5.17   | 0.97            |
| Carnitine uM          | 9.80                | 8.29    | 5.25                | 4.42   | 0.06            |
| Choline uM            | 9.88                | 2.31    | 10.89               | 2.06   | 0.18            |
| Citrate uM            | 9.61                | 4.06    | 11.38               | 4.35   | 0.23            |
| Creatine uM           | 11.85               | 4.45    | 14.71               | 6.70   | 0.15            |
| Creatine phosphate uM | 22.24               | 10.24   | 22.55               | 8.33   | 0.92            |
| Creatinine uM         | 7.58                | 3.67    | 6.88                | 2.15   | 0.51            |
| Dimethylamine uM      | 3.98                | 2.89    | 3.65                | 2.27   | 0.71            |
| Formate uM            | 58.20               | 37.14   | 61.73               | 25.97  | 0.75            |
| Fumarate uM           | 2.68                | 1.45    | 2.37                | 1.29   | 0.51            |
| Glucose uM            | 771.74              | 613.42  | 720.86              | 515.50 | 0.80            |
| Glutamate uM          | 119.36              | 26.16   | 113.42              | 24.46  | 0.50            |
| Glutamine uM          | 32.34               | 25.58   | 62.19               | 28.80  | <b>&lt;0.01</b> |
| Glycine uM            | 97.84               | 29.01   | 102.55              | 36.27  | 0.68            |
| Isobutyrate uM        | 9.77                | 2.29    | 9.74                | 2.38   | 0.97            |
| Isoleucine uM         | 29.88               | 6.39    | 30.66               | 6.56   | 0.73            |
| Isovalerate uM        | 13.13               | 5.64    | 12.38               | 4.81   | 0.68            |
| Lactate uM            | 3432.57             | 1592.72 | 4149.78             | 501.52 | 0.09            |
| Leucine uM            | 48.41               | 13.62   | 50.04               | 14.87  | 0.74            |
| Lysine uM             | 57.36               | 12.69   | 62.19               | 12.85  | 0.28            |
| Methionine uM         | 6.06                | 2.78    | 5.56                | 2.22   | 0.57            |
| Methylamine uM        | 2.92                | 1.26    | 3.06                | 1.49   | 0.78            |
| Methulsuccinate uM    | 4.00                | 1.45    | 4.48                | 1.93   | 0.42            |
| O-Phosphocholine uM   | 23.45               | 4.97    | 21.26               | 4.31   | 0.18            |
| Ornithine uM          | 44.29               | 13.12   | 48.77               | 14.38  | 0.35            |
| Phenylalanine uM      | 22.88               | 4.57    | 23.22               | 7.00   | 0.87            |
| Proline uM            | 58.85               | 20.37   | 66.10               | 21.75  | 0.32            |

|                                |        |       |        |       |             |
|--------------------------------|--------|-------|--------|-------|-------------|
| Pyruvate uM                    | 8.30   | 4.64  | 8.02   | 4.14  | 0.85        |
| Serine uM                      | 37.30  | 8.37  | 48.98  | 16.56 | <b>0.02</b> |
| sn-Glycero-3-phosphocholine uM | 75.14  | 41.51 | 56.92  | 27.14 | 0.14        |
| Succinate uM                   | 12.35  | 4.88  | 13.66  | 3.14  | 0.36        |
| Threonine uM                   | 46.68  | 13.20 | 50.04  | 17.30 | 0.53        |
| Trimethylamine N-oxide uM      | 5.75   | 2.87  | 4.79   | 3.19  | 0.37        |
| Tryptophan uM                  | 20.37  | 4.52  | 21.53  | 5.73  | 0.52        |
| Tyrosine uM                    | 37.64  | 7.96  | 38.15  | 9.33  | 0.87        |
| Valine uM                      | 100.58 | 21.66 | 104.52 | 16.26 | 0.55        |

---

**Comparison of metabolites' concentration at 6 months of patients who were non-responders at 6 months, but were either good responders or non-responders at 12 months.**

| Variables             | Non-Responders |         | Late Responders |        | p           |
|-----------------------|----------------|---------|-----------------|--------|-------------|
|                       | n= 9           |         | n=8             |        |             |
|                       | Mean           | ±SD     | Mean            | ±SD    |             |
| 3-Hydroxybutyrate uM  | 26.62          | 26.17   | 14.93           | 5.62   | 0.24        |
| 5,6-Dihydrothymine uM | 24.53          | 7.85    | 20.65           | 10.30  | 0.39        |
| Acetate uM            | 167.57         | 94.24   | 112.50          | 38.52  | 0.14        |
| Acetoacetate uM       | 19.87          | 6.88    | 27.23           | 10.14  | 0.10        |
| Acetone uM            | 183.11         | 117.29  | 230.05          | 145.29 | 0.47        |
| Adipate uM            | 225.51         | 84.02   | 179.46          | 30.98  | 0.16        |
| Alanine uM            | 187.01         | 70.24   | 195.41          | 44.78  | 0.78        |
| Arginine uM           | 29.63          | 17.27   | 37.29           | 15.96  | 0.36        |
| Betaine uM            | 11.90          | 6.94    | 11.75           | 5.71   | 0.96        |
| Butyrate uM           | 15.96          | 6.72    | 15.11           | 4.91   | 0.77        |
| Carnitine uM          | 5.26           | 5.78    | 6.79            | 5.81   | 0.59        |
| Choline uM            | 11.76          | 3.72    | 11.41           | 1.70   | 0.81        |
| Citrate uM            | 11.43          | 3.08    | 8.96            | 2.66   | 0.10        |
| Creatine uM           | 12.50          | 3.19    | 13.83           | 2.22   | 0.34        |
| Creatine phosphate uM | 23.77          | 9.06    | 19.19           | 9.51   | 0.33        |
| Creatinine uM         | 8.81           | 3.97    | 8.48            | 2.65   | 0.84        |
| Dimethylamine uM      | 4.29           | 1.75    | 2.68            | 0.81   | <b>0.03</b> |
| Formate uM            | 69.51          | 48.09   | 49.99           | 13.48  | 0.29        |
| Fumarate uM           | 2.48           | 0.98    | 2.48            | 0.75   | 0.99        |
| Glucose uM            | 496.86         | 301.53  | 480.81          | 218.75 | 0.90        |
| Glutamate uM          | 124.44         | 51.20   | 134.24          | 44.42  | 0.68        |
| Glutamine uM          | 49.09          | 24.67   | 55.74           | 23.20  | 0.58        |
| Glycine uM            | 105.51         | 32.16   | 123.28          | 30.80  | 0.26        |
| Isobutyrate uM        | 10.18          | 3.96    | 8.55            | 1.99   | 0.31        |
| Isoleucine uM         | 35.68          | 8.15    | 30.29           | 5.78   | 0.14        |
| Isovalerate uM        | 14.02          | 3.72    | 11.99           | 5.79   | 0.40        |
| Lactate uM            | 4144.04        | 1239.21 | 3906.61         | 919.56 | 0.66        |
| Leucine uM            | 51.77          | 13.77   | 56.24           | 16.41  | 0.55        |
| Lysine uM             | 62.86          | 13.24   | 58.38           | 12.15  | 0.48        |
| Methionine uM         | 5.80           | 2.85    | 5.13            | 1.70   | 0.56        |
| Methylamine uM        | 2.24           | 0.88    | 3.19            | 0.81   | <b>0.04</b> |
| Methulsuccinate uM    | 4.32           | 3.35    | 4.08            | 1.97   | 0.86        |
| O-Phosphocholine uM   | 22.30          | 4.38    | 21.11           | 4.51   | 0.59        |

|                                |        |       |        |       |             |
|--------------------------------|--------|-------|--------|-------|-------------|
| Ornithine uM                   | 51.19  | 14.86 | 38.40  | 8.60  | <b>0.05</b> |
| Phenylalanine uM               | 22.43  | 12.42 | 22.01  | 2.43  | 0.93        |
| Proline uM                     | 67.76  | 25.99 | 76.04  | 25.51 | 0.52        |
| Pyruvate uM                    | 8.16   | 2.50  | 7.19   | 2.00  | 0.40        |
| Serine uM                      | 47.20  | 18.24 | 55.45  | 23.23 | 0.43        |
| sn-Glycero-3-phosphocholine uM | 45.29  | 23.40 | 60.30  | 23.48 | 0.21        |
| Succinate uM                   | 13.22  | 7.27  | 13.83  | 7.16  | 0.87        |
| Threonine uM                   | 51.30  | 14.92 | 59.35  | 20.04 | 0.36        |
| Trimethylamine N-oxide uM      | 5.50   | 4.97  | 4.18   | 2.76  | 0.52        |
| Tryptophan uM                  | 18.08  | 5.59  | 21.05  | 4.50  | 0.25        |
| Tyrosine uM                    | 37.50  | 7.28  | 38.58  | 7.72  | 0.77        |
| Valine uM                      | 113.21 | 22.85 | 107.08 | 16.96 | 0.54        |

---



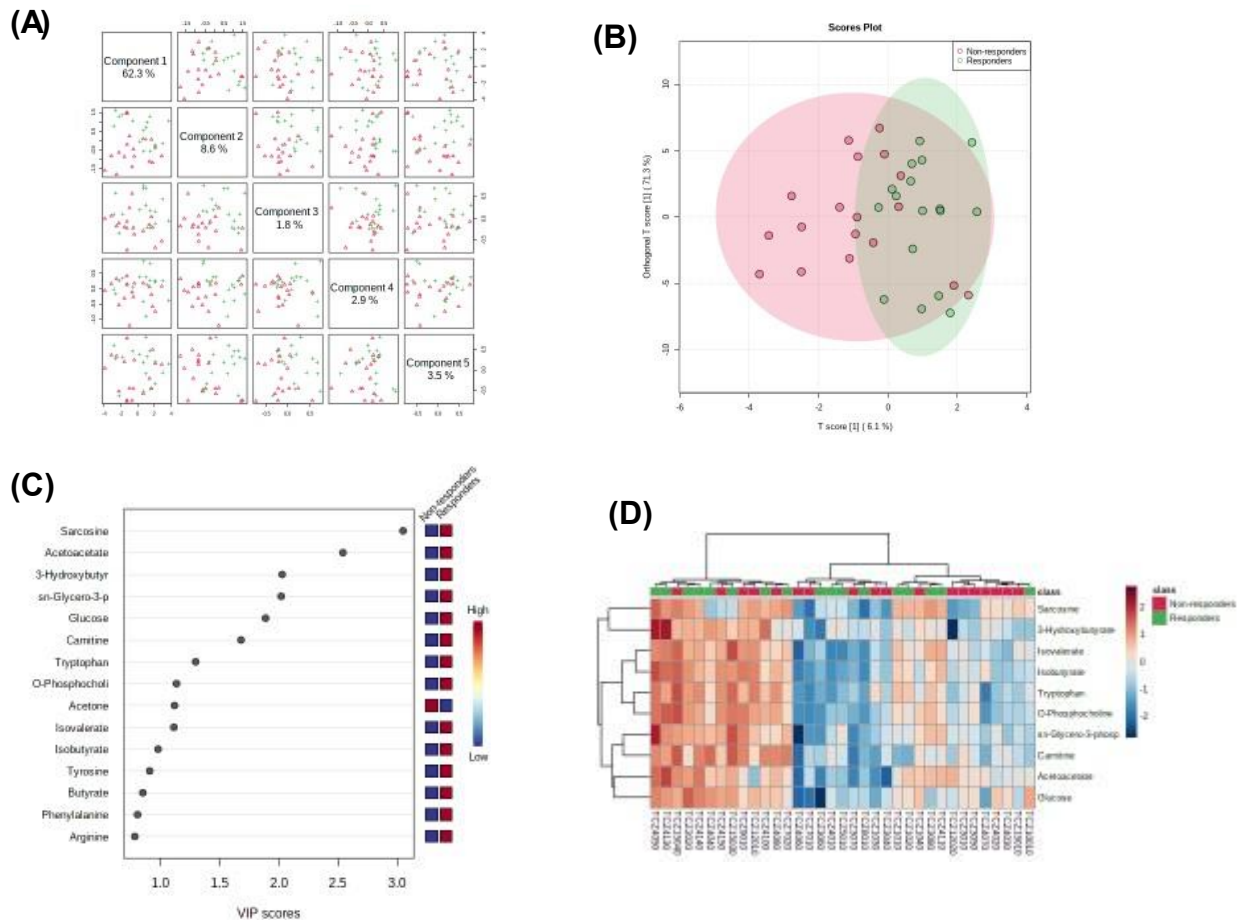

**Supplementary Figure S1.** Plasma metabolic profile and IL-6, IL-6R and IL6/IL-6R ratio discriminate responders and non-responders. (A) Pairwise score plots between the 5 principal components showing a total explained variance is 79.1%. (B) Orthogonal PLS-DA between non-responders and responders at baseline. (C) Important features identified by PLS-DA. (D) Concentration of metabolites in format Heatmap based in Euclidean distances, shows clustering between responders and non-responders according to metabolites obtained from Supplementary Figure S1C.

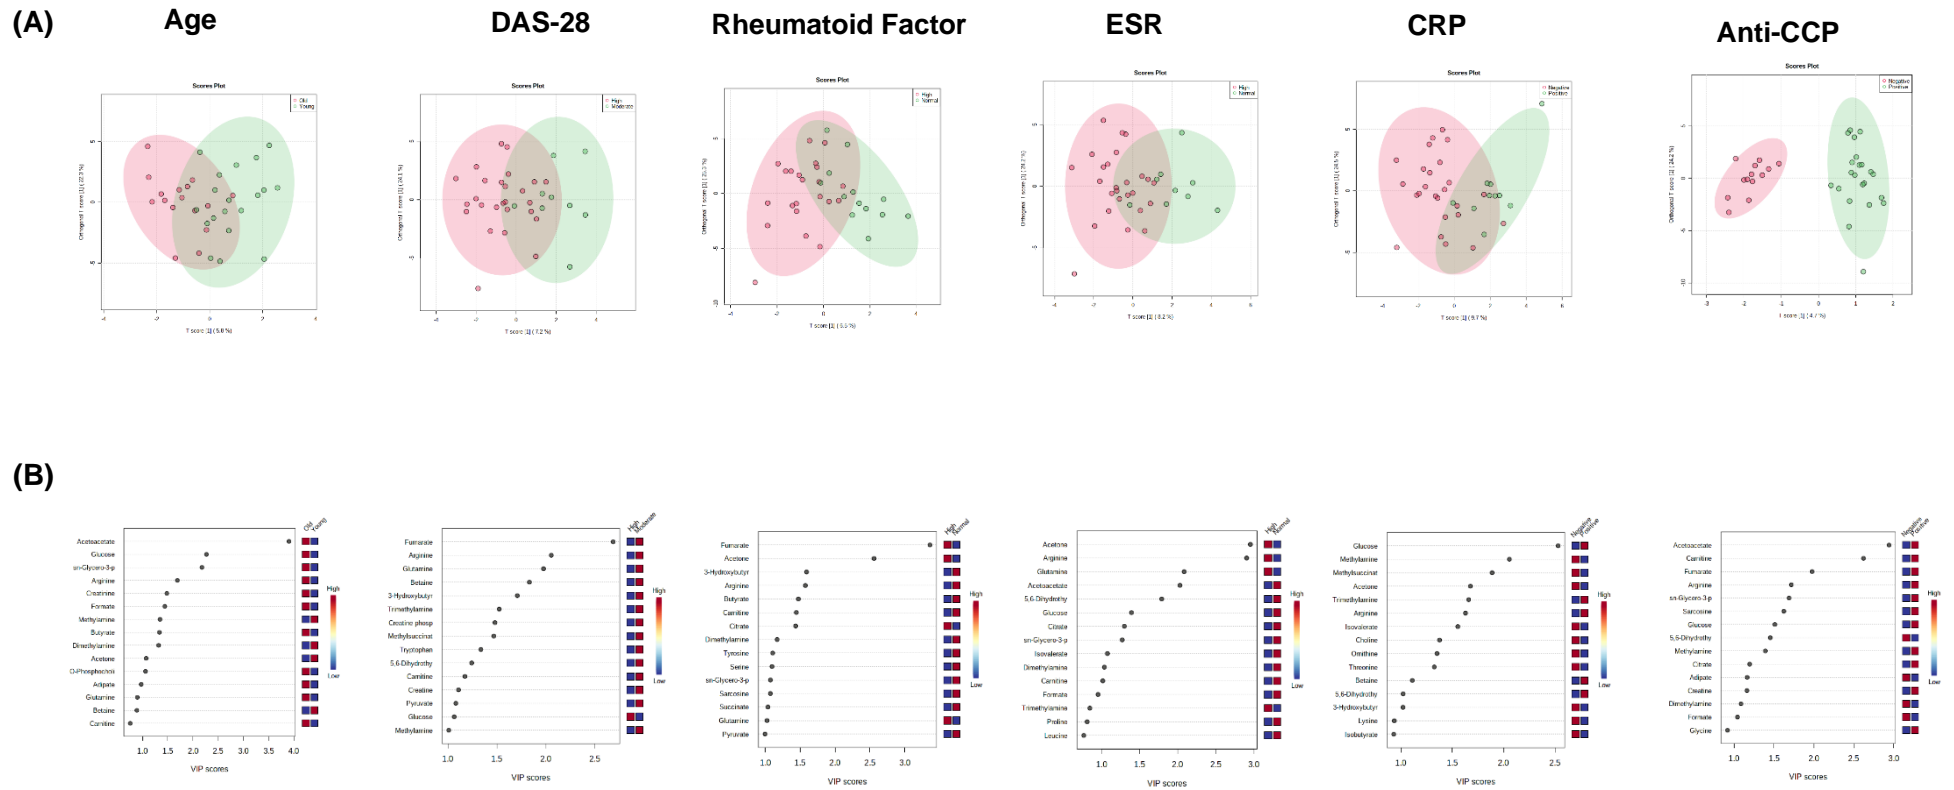

**Supplementary figure S2.** Discrimination between different clinical parameter according to metabolite's concentration. (A) Orthogonal PLS-DA from plasma metabolic profile of patients according to different clinical variable shows the influence of metabolites to categorize them according to the cutoff value. (B) Important features identified. Age (young <55 years vs old  $\geq 55$  years), DAS28 (High activity vs moderate activity), RF (Positive  $>25$  IU/mL vs negative  $\leq 25$  IU/mL), ESR (High  $\geq 30$  mm/h vs normal  $< 30$  mm/h) and CRP (negative  $< 2.0$  mg/L vs positive  $\geq 2.0$  mg/L) and anti CCP (positive  $> 20$  IU/mL vs negative anti-CCP  $\leq 20$  IU/mL)

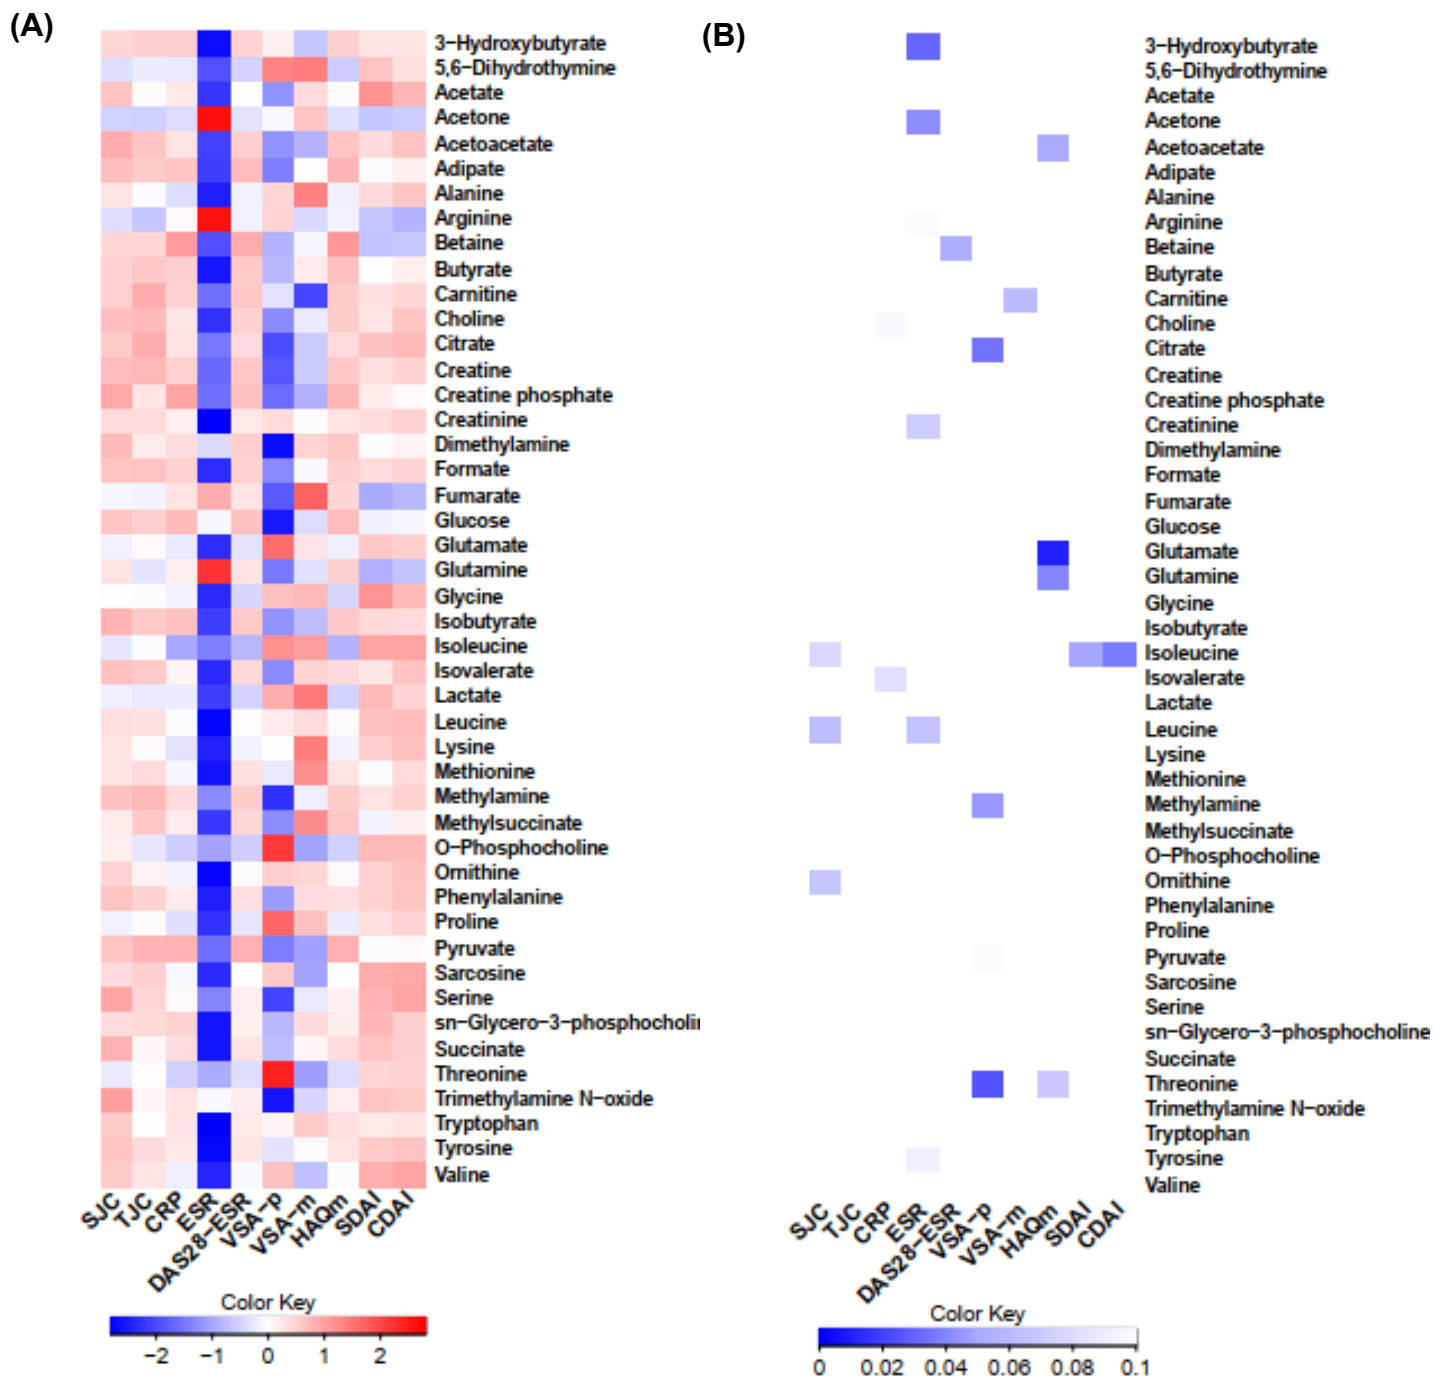

**Supplementary Figure S3.** Pearson correlation adjusted by age, DM, and DL between clinical variables and metabolites obtained by  $^1\text{H-NMR}$  before TCZ treatment. (A) The strength of association for each pair were used to form a clustered heatmap, to lend insight into which clinical scores were correlated with which groups of polar metabolites. (B) Correlation significant P-values are displaying on figure S3-B where the row and column order was preserved from figure S3-A. DAS-28: Disease activity score 28; SDAI: Simple disease activity index; CDAI: Clinical disease activity index; ESR: erythrocyte sedimentation rate; CRP: C-reactive protein.

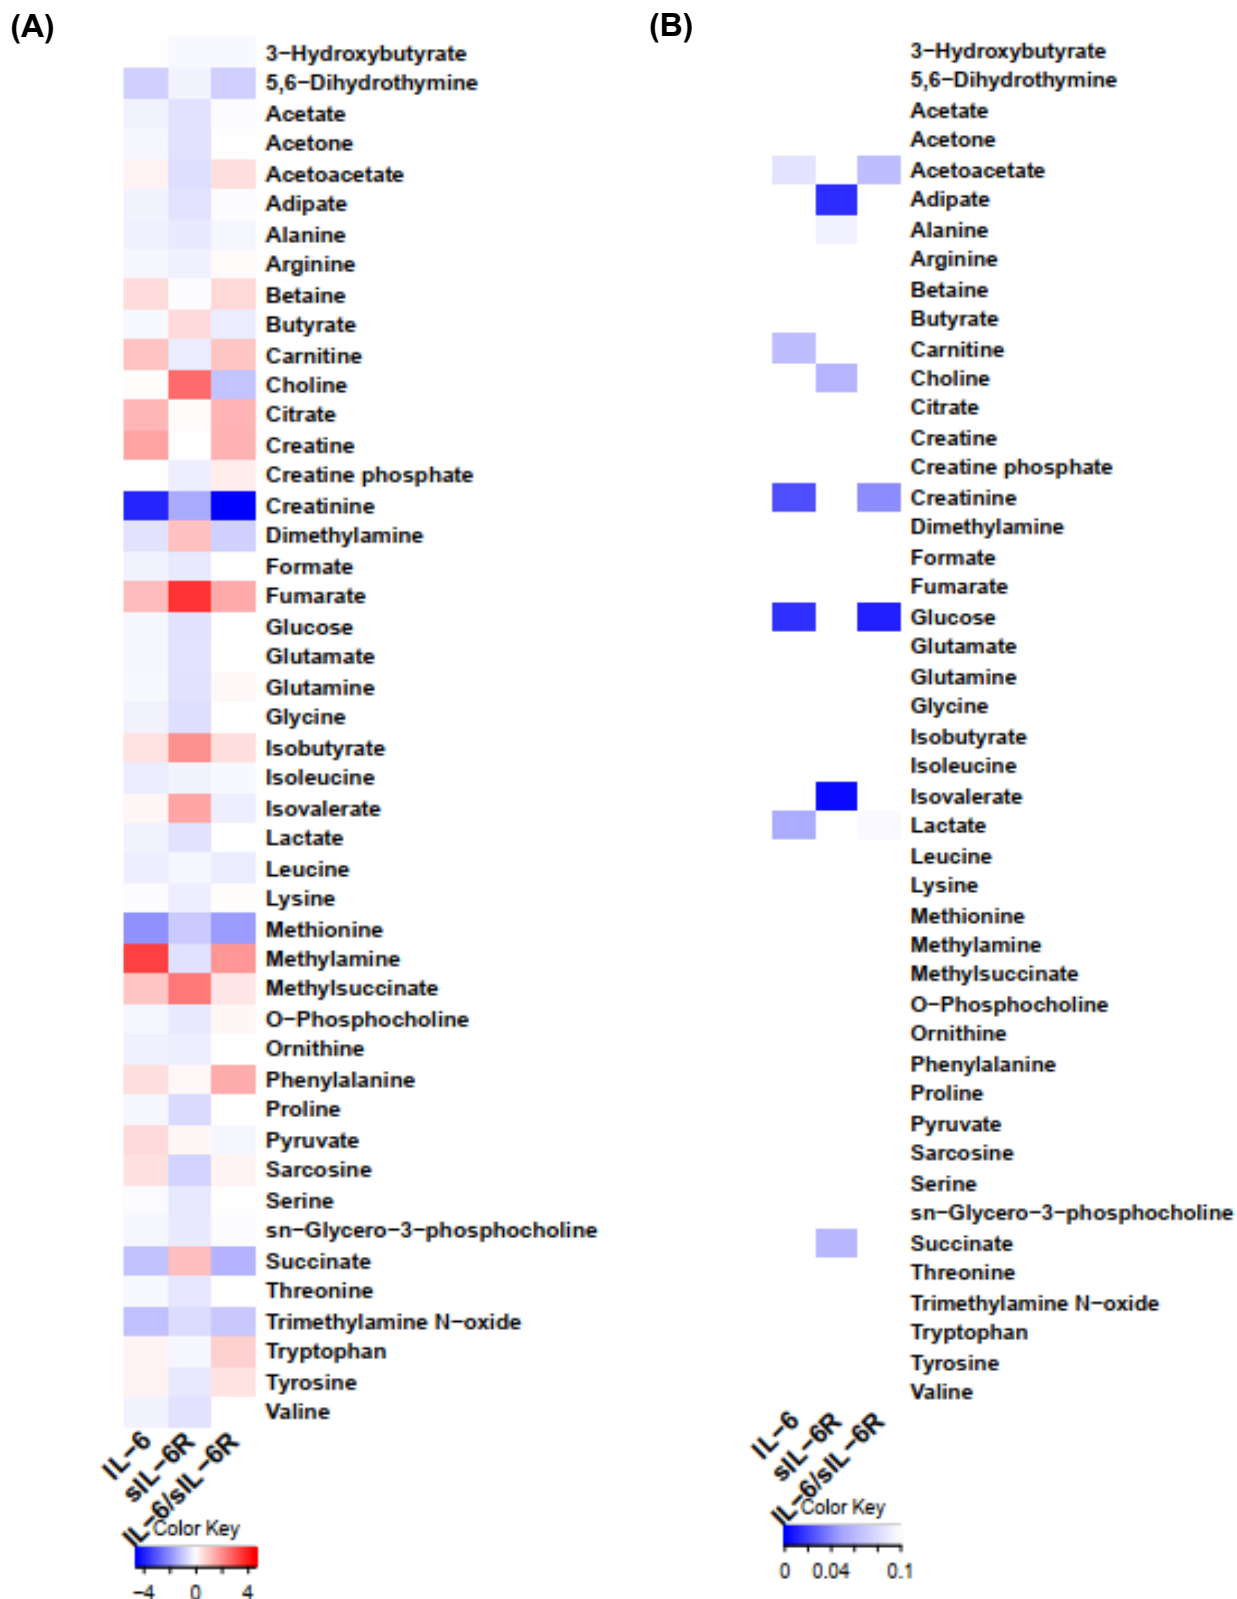

**Supplementary Figure S4.** Pearson correlation adjusted by age, DM, and DL between IL-6, sIL-6R, IL-6/IL-6R and metabolites obtained by  $^1\text{H-NMR}$  before TCZ treatment. (A) The strength of association for each pair were used to form a clustered heatmap, to lend insight into which interleukins were correlated with which groups of polar metabolites. (B) Correlation significant p-values are displaying on figure S4-B where the row and column order was preserved from figure S4-A.

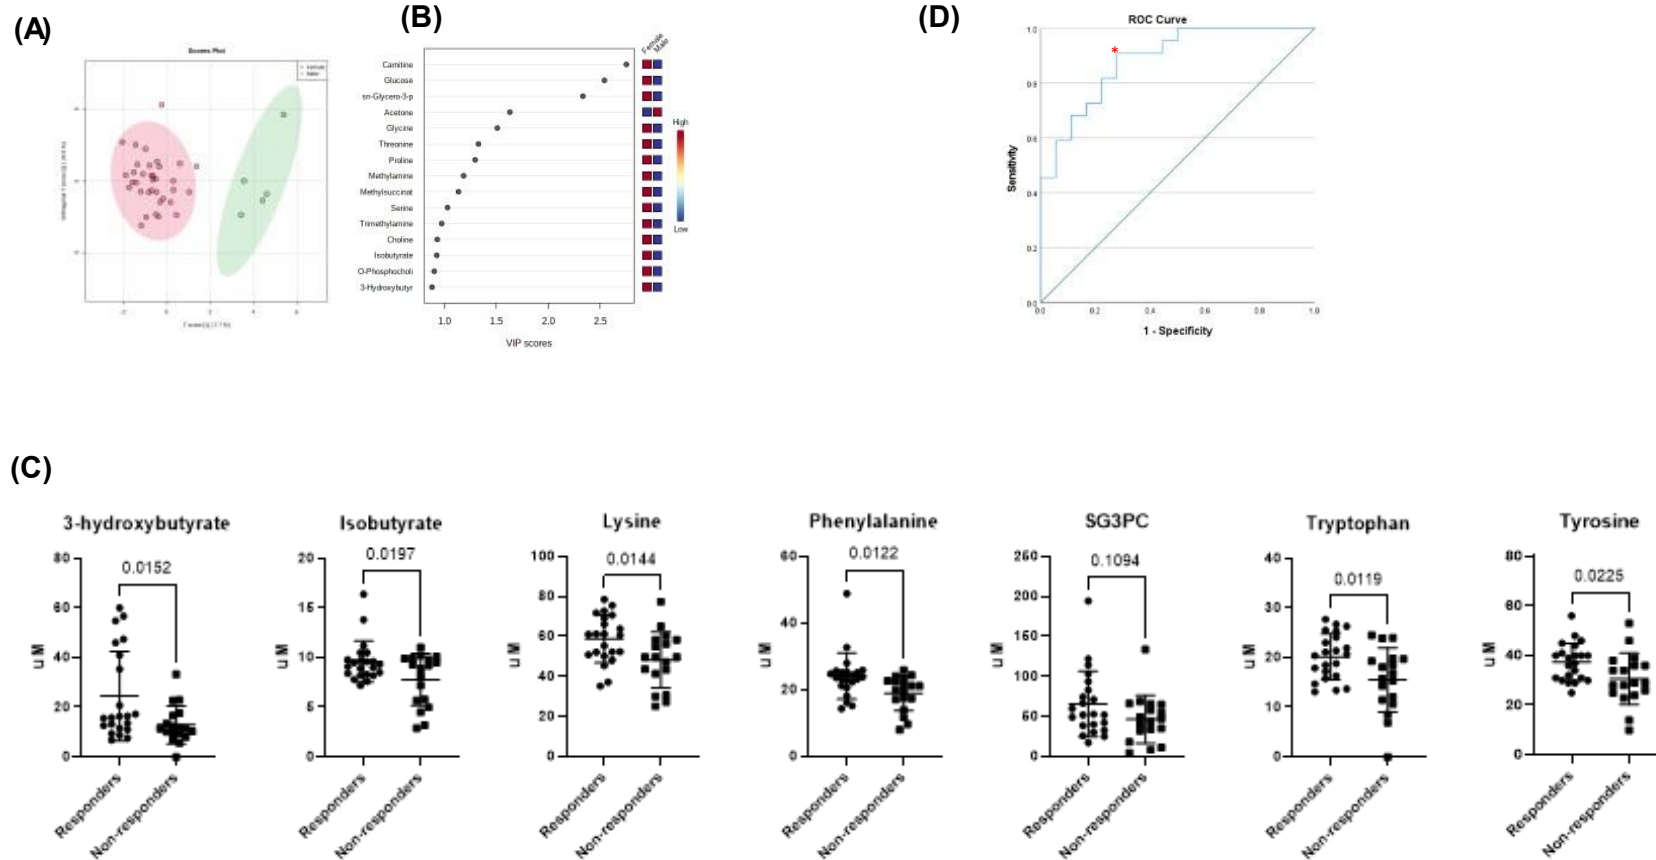

**Supplementary Figure S5.** **A)** Orthogonal PLS-DA between men and women at baseline. **B)** Important features identified by PLS-DA. **C)** Concentrations of specific polar metabolites at baseline that are different between TCZ responders and non-responders measured by <sup>1</sup>H-NMR before treatment with TCZ (n=40 patients). p values are shown in the graphics. **D)** Receiver operating characteristic (ROC) curve for the model probability  $p_{\text{responders}}$  before treatment based on binary logistic regression analyzing all 40 patients. The area under the curve (AUC) was 0.886 with a  $p < 0.001$ . The patients with elevated phenylalanine and 3-hydroxybutyrate had 1.14 chances to respond to tocilizumab, with a sensitivity and specificity of 80%.

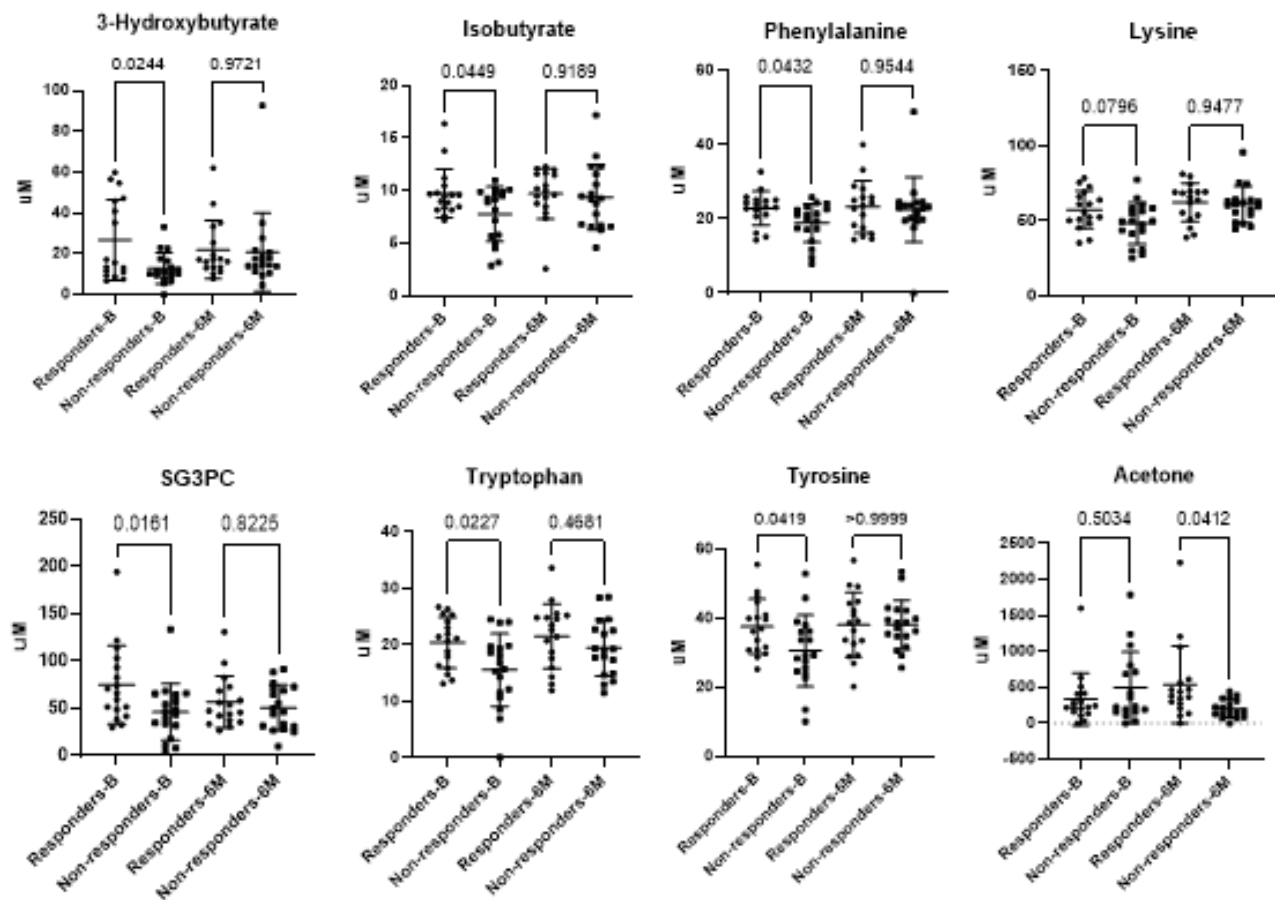

**Supplementary Figure S6.** Concentrations of specific polar metabolites that are different between TCZ responders and non-responders measured by  $^1\text{H-NMR}$  before (B-baseline) and after treatment (6M-6 months) with TCZ. p values are shown in the graphics.
